# Supplementary material
Source: PubMed Central journal article supplement (PMC6755757)
Supplement: JB.00218-19-s0001.pdf [file JB.00218-19-s0001.pdf]

**Supplemental Figures, Tables and Movie Legends for:**

**JB00218-19**

**“The carboxy-terminal region of *Flavobacterium johnsoniae* SprB facilitates its secretion by the type IX secretion system and propulsion by the gliding motility machinery.”**

Surashree S. Kulkarni, Joseph J. Johnston, Yongtao Zhu, Zachary T. Hying and Mark J. McBride.

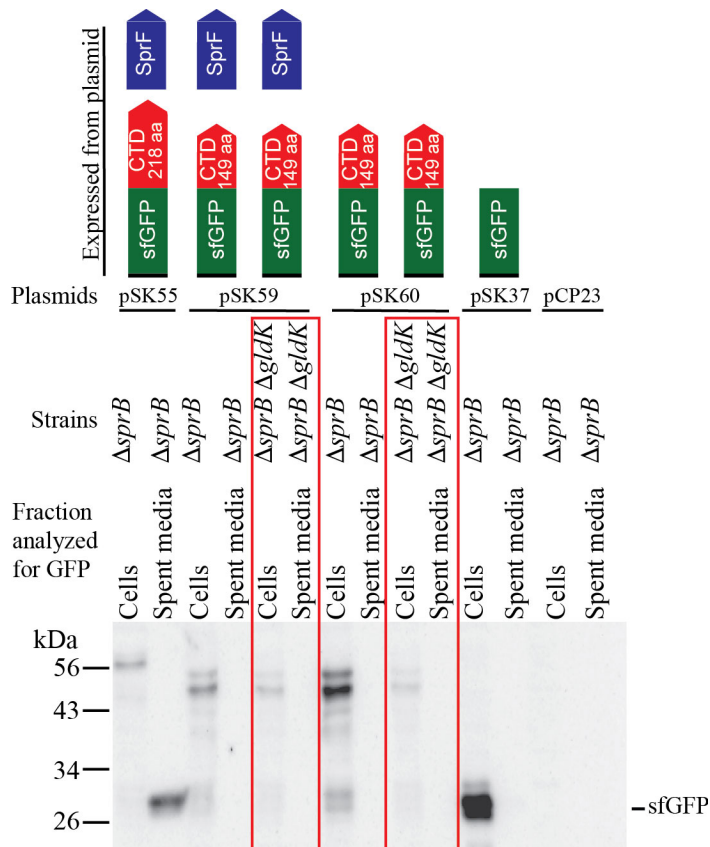

**Figure S1. T9SS-mediated secretion of sfGFP fused to the CTD of SprB.** (This figure is identical to Fig. 2C in the main text, except that the four lanes boxed in red above that were removed in constructing Fig. 2C are included here. These lanes, which added no useful information, were removed from Fig. 2C to simplify the presentation.) Cultures were incubated in CYE at 25°C with shaking and harvested in the late exponential phase of growth. Cells and spent culture media were separated by centrifugation and analyzed by Western blot using antiserum against GFP. Cell samples corresponded to 10  $\mu$ g protein per lane and samples from spent media corresponded to the volume of spent medium that contained 10  $\mu$ g protein before the cells were removed. Plasmids used were pCP23 (Empty vector); pSK37, which expresses sfGFP with N-terminal signal peptide; pSK55, which co-expresses SP-sfGFP-CTD<sub>SprB218AA</sub> and SprF; pSK60, which expresses SP-sfGFP fused to the 149-amino acid CTD of SprB (SP-sfGFP-CTD<sub>SprB149AA</sub>); or pSK59, which co-expresses SP-sfGFP-CTD<sub>SprB149AA</sub> and SprF. Cartoons depicting the proteins expressed from the plasmids are indicated above the lanes.

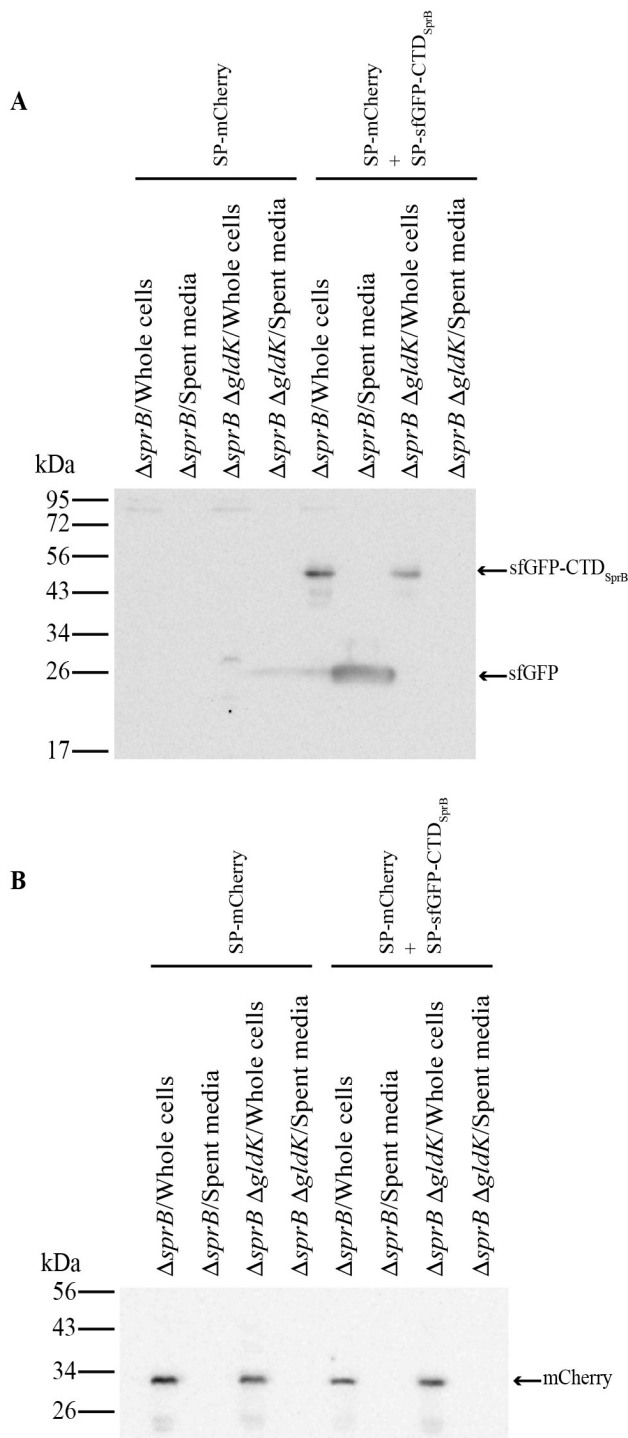

**Figure S2. Analysis of cells for leakage of periplasmic mCherry.** Cultures of  $\Delta sprB$  mutant or of the T9SS mutant  $\Delta sprB \Delta gldK$  expressing SP-mCherry (pJJ21), or SP-sfGFP-CTD<sub>SprB</sub> (pSK55) and SP-mCherry (pJJ21) were incubated in CYE at 25°C with shaking. One ml samples were centrifuged at 22,000 x g for 15 min. The culture supernatant (spent medium) and intact cells were analyzed by SDS-PAGE, followed by western blot using (A) anti-GFP antibodies (to detect secretion of SP-sfGFP-CTD<sub>SprB</sub>) and (B) anti-mCherry antibodies (to detect leakage of periplasmic mCherry). Identical samples were used in panels A and B. Cell samples corresponded to 15  $\mu$ g protein per lane and samples from spent media corresponded to the volume of spent medium that contained 15  $\mu$ g protein before the cells were removed. For additional controls regarding specificity of the anti-mCherry antibodies see (1-3).

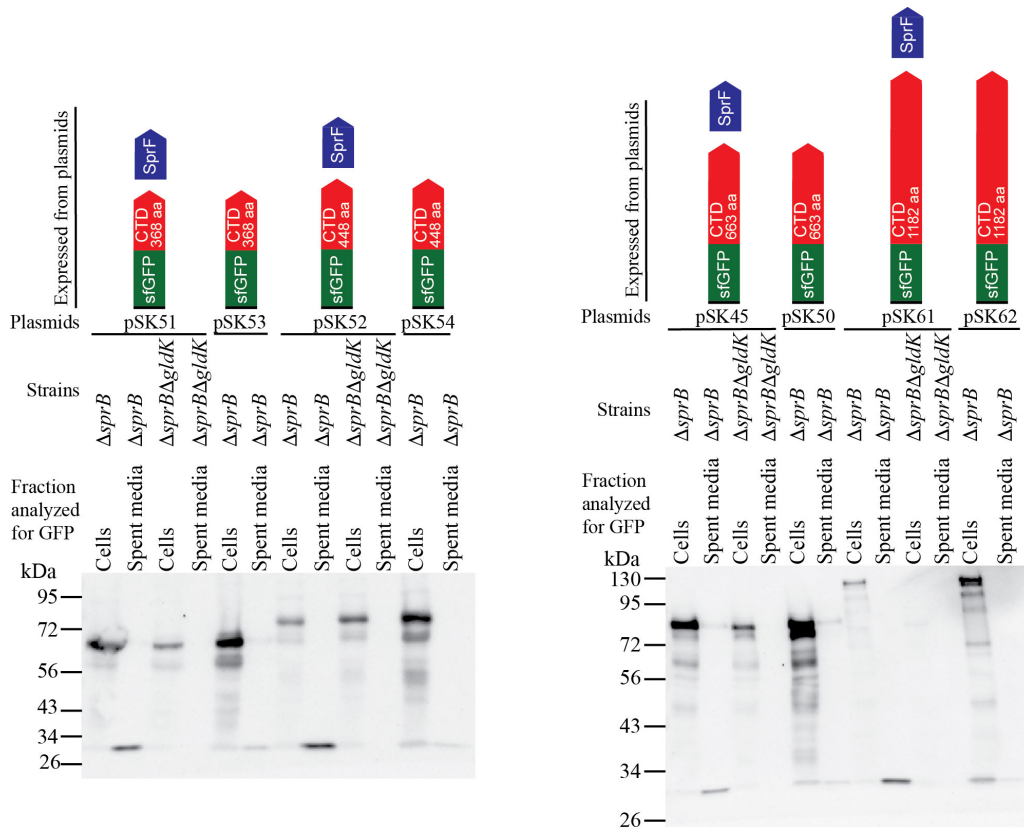

**Figure S3. T9SS-mediated secretion of sfGFP fused to long C-terminal regions (CTDs) of SprB, with or without plasmid co-expression of SprF.** Cultures carrying the plasmids indicated were incubated in CYE at 25°C with shaking and harvested in the late exponential phase of growth. Cells and spent culture media were separated by centrifugation and analyzed by SDS-PAGE followed by Western blot using antiserum against GFP. Whole cell samples corresponded to 10 µg protein per lane and samples from spent media corresponded to the volume of spent medium that contained 10 µg protein before the cells were removed. All strains carried a deletion of *sprB* to avoid SprF being sequestered by SprB. Some strains carried a *gldK* deletion ( $\Delta gldK$ ) to disable the T9SS. All strains were wild type for *sprF* on the chromosome but some expressed additional SprF from plasmid as indicated. Plasmids used were pSK53, which expresses SP-sfGFP fused to the 368-amino acid CTD of SprB (SP-sfGFP-CTD<sub>SprB368</sub>); pSK51, which co-expresses SP-sfGFP-CTD<sub>SprB368</sub> and SprF; pSK54, which expresses SP-sfGFP fused to the 448 amino acid CTD of SprB (SP-sfGFP-CTD<sub>SprB448</sub>); pSK52, which co-expresses SP-sfGFP-CTD<sub>SprB448</sub> and SprF; pSK50, which expresses SP-sfGFP fused to the 663 amino acid CTD of SprB (SP-sfGFP-CTD<sub>SprB663</sub>); pSK45 which co-expresses SP-sfGFP-CTD<sub>SprB663</sub> and SprF; pSK62, which expresses SP-sfGFP fused to the 1182 amino acid CTD of SprB (SP-sfGFP-CTD<sub>SprB1182</sub>); and pSK61 which co-expresses SP-sfGFP-CTD<sub>SprB1182</sub> and SprF. Cartoons depicting the proteins expressed from the plasmids are indicated above the appropriate lanes.

```

SprB      DGGTIQPGNIFINIPAGDHTTRV RHTNG---CTADVDFNIGYA-----PLQLTLTEERGVVNVITASAVGGG
Fjoh_1123 NDTDIVSNTYEADLINAGKYTLTVGKIQNDIYCNKHFELVRSVLP TIKQ-----TRYQELSDNNFIEII---PTTD
Fjoh_1645      ISYRFTVTNTTGNVPLSG-----ITITDLLP-GVV-----VSGQALDLNVG-----ESNDTN
Fjoh_1720  GMSYLWSNGATTITQTTDIKAGTYTVDVTS P SPENCITSRKTIIVDEHYF-----PEINRI IINGTQVEI---QLKKEE
Fjoh_1985      ITIKVSDKSNNISECSFHL-----FAYPVLV DAGED-----IE-----INEGQF---YK LQAV---ALENG S
Fjoh_2273      VAGCTSEPAEVPVTIND-----SPVPVLNSDGNFCGLTNP TIGDL SNNINIPATV V WYD---APDNGN
Fjoh_3478      TPNFGHEHVTFTITVNNVGE GSFIN-----TIVSEILP S YDLVSFN-----TTGGTYD PATQLWIT---PALASG
Fjoh_3952      LTYTFTITNNGNVP LHN-----ITISDLLP-GVV-----ITGGPISLGVG-----ESDSHT
Fjoh_3971  EVDQTDAA MGSEVIFTITAE NLGNLTATN-----VEVQDILPKGYLLNSST---VSSGTYNSSTS V WAI---PSVNAIG
Fjoh_4538      TVAPNGT SNIITSEACNDTTLLNLSNLLPEGTP-----ITGTWFD TNDT---RALQGN
Fjoh_4750  FSVTDSFGCKAEVAVYNNVNTPV LGTANFSITGSYG---KDMYDLYS I YDPIITFIN-----LATGDFTLI SWDFGD---GNFSNE
Fjoh_4934      SYLWSNGETSNSAIISAPGDYSVTVK DANGCEKTKNFKVILSE PATITN-----AAVKDFSGNDNSVLI---EYTG T

```

```

SprB      GEYVY-SIDGVNFSSETKFKIYK TGT---YITIVTRDKNGCTD TKDY Y I EYVD-----VCLDNYFTIPNGDGVNDTWGPGCT---N-
Fjoh_1123  GSLEY-SIDGINYQNSNYFSNTIQGGT---YVVYLRDKEGCGQDSKEVTV-----IDYPKFFTPNDGYNDFWHIKNT---S-
Fjoh_1645  FSALY-KITQTTDINS GKVS NQASVQ GK SARGVVV EDNSDYENIDGDKPTVLDLNGCKIKV LNAFSPNGDQKNERFYIQGL---E-
Fjoh_1720  PYFEY-SVDGINFQDSNIFYDVP GGL---HTAYVKEKNGCGGI GLDFVY-----LVFPAFFTPNDSYNDLWEVTGM---E-
Fjoh_1985  FSWSP-SAGLNHTKVG NPI-ATPQETTITVIVFTNKIEGQAE DSVTITVIPLEK---DETKYGFSPNGDGINDFWEIDKI---T-
Fjoh_2273  LLSASTRLTEQGRYYGFNFPNSACFSSEYIEVTVA-LTD CDNV PND-----FFIPDGFSPNGDGINDSFVIKDI---EF
Fjoh_3478  QSLVL-TI VAEVLP SGN YLNVA AIEISTPLD VDAANNSASASVEPIC-----LTVYNEFTPNNDGANDLFRIDCI---E-
Fjoh_3952  FTGTY-TL TQADINAGTVVNQATV TGTTS GIKV EDKSDAANENGDA PTEIDVNGCKIKIFNAISLNGDNMNERFYIRGI---E-
Fjoh_3971  STQTL-TINAKVVD FNDYLNIAHLV KMDQIDTNSNNQDSAAVSPNC-----LKIYNEFS PNDGQNDTFYIDCI---T-
Fjoh_4538  I LNAH-GLALGN YQFEYKIITNENCPRS--ILLTMEVND DCKVLACEN-----ILVHNAFSPNGDGKNDVFLIDGI GDLT-
Fjoh_4750  ENPKH-IYTKVGT YTIKQTVTY PFCQYSYSATI KVEK GYS-----LIMPNAFTPNNDGYNDIFAPVFL-----
Fjoh_4934  GNYEF-SLDGLTFQDNPLF TAVATGT---YNAITAKDKNGCGLSNSFLLYV-----LDYPRFFFTPNNGDGYNDLWVIEDS---N-

```

```

SprB      IYNHLKFSIFDRYGRVI-AKYTYGQK---WDGRYNGEE-----LPSGDYVYV LKLN DENDG---REFVGHFTLYR
Fjoh_1123  KFPNSKTSIFDRYGKLIKELFANDEHG---WDGFFYNGSQ-----MPADDYWFKANF---NEN---INFSGHFSLKR
Fjoh_1645  CYPENTVEIYNRWGVLVFDVDHYNNVDRVFKGYSFGRTT MKQSEGLPVGT YFYILKYKDS DSN---PHETS GYLYINK
Fjoh_1720  NYPQAQVTIFDRYGKLI AQLNASKMS---WDGTFEKTTP-----MPASDYWYALKI---DDS---KPTLRGHFSLKR
Fjoh_1985  DYPENEVL IYSRWGDLVYQTKGYDNS TNVFSG IANKSRNLGASQ-LPEGTYFFEIRVNQPHHF---KKLKG YLV LKR
Fjoh_2273  LYPNYTLEIFNRYGNGMYKGDKNKPA---WDGMNYEKSGIAGGV-APNGVYFVVLHFN---KDN---KPKQGRLYLNR
Fjoh_3478  SYPNNE LKVFNRYGALVYSKQHYEND---WDGTANVSGVVNRGDM LPTGT YFYVIT I---GDG---TVKKGWLSIMR
Fjoh_3952  CYPDNTVQIFNRRWGLVFERDHYNNNDIVFKGFSEGRRTTVKESNGLPEGTYFYIVRYKDNNSN---PKQEAGYLYLIK
Fjoh_3971  QYPDNQLEIFNRRWGNLVY YKKG YDN T---WDGKADGSAKT---LPEGTYFYVLDL---GNG---SAKRS GWLYL-K
Fjoh_4538  CYPENTVEIYNRWGILVFE THYNNNTINAFDGT SRGRTTIRQSEGLPTGT YFYIVTYKSV DGN NVIQNNKKEGYLYLSK
Fjoh_4750  GLSDITLDVFDTWGGV IYTEKGTNIRG---WNGKVKDID-----AENGNYYYKIILKTFYNH---TIVEKGAFTLIK
Fjoh_4934  VLPNYTIHIFDRYGKFLKEMNQNSPG---WNGLFNGQQ-----LPSDDYWF TLTTF---ADG---RNVKGHFSLKR

```

**Figure S4. Alignment of the C-terminal 200 amino acids of *F. johnsoniae* proteins that belong to TIGRFAM family TIGR04131 (type-B CTD).** Protein sequences were aligned using MUSCLE. Dark shading indicates identical amino acids and light shading indicates similar amino acids. Proteins that were examined experimentally in this study were SprB, Fjoh\_3952, and Fjoh\_1123.

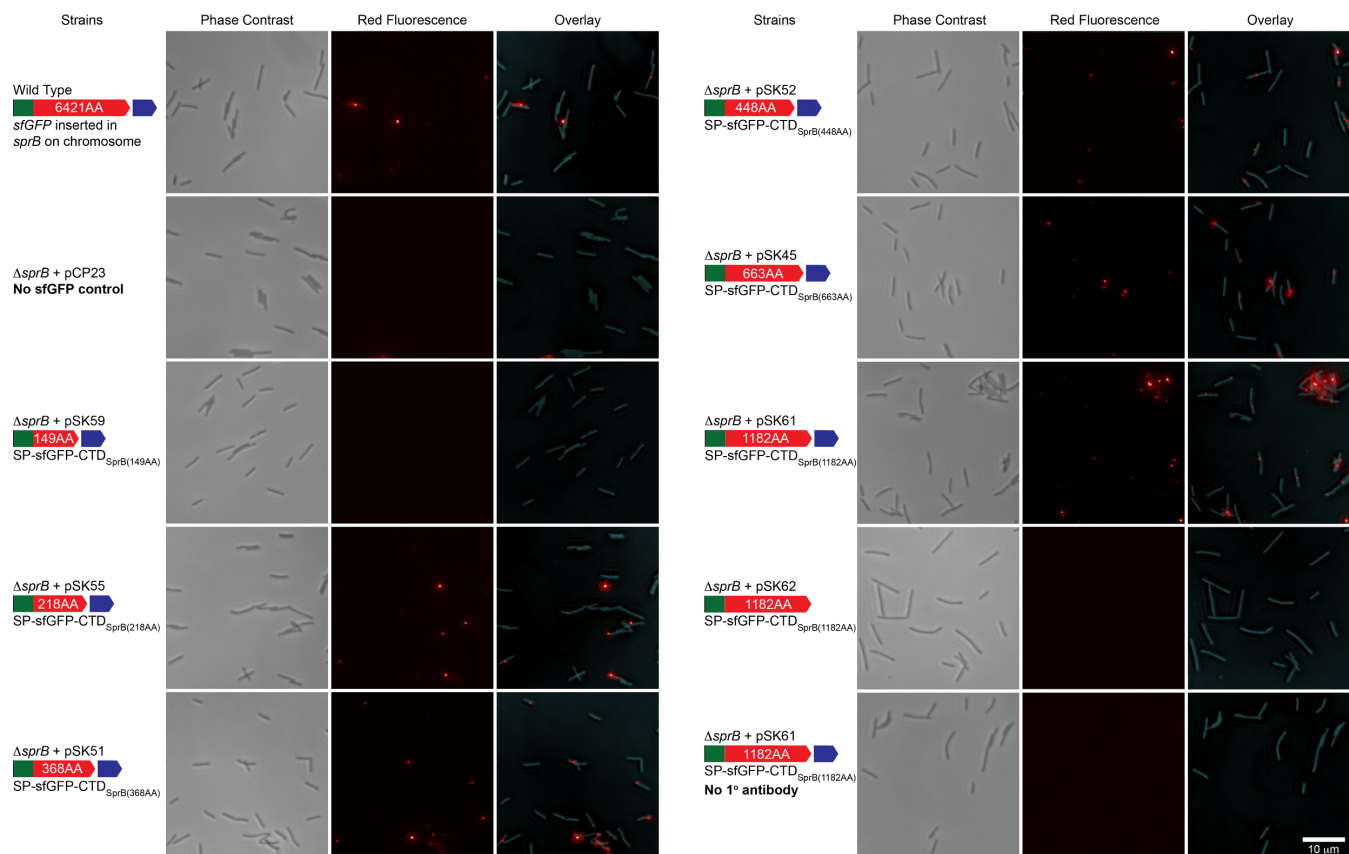

**Figure S5. Surface-localization sfGFP by attachment to C-terminal regions of SprB.** Cells expressing SP-sfGFP fused to C-terminal regions (CTDs) of SprB ranging from 149 to 6421 amino acids were exposed to anti-GFP and 2<sup>o</sup> antibody fused to Alexa Fluor 594 and observed by fluorescence microscopy to detect sfGFP exposed on the cell surface. Exposure times for fluorescence images were all 33 msec. Phase contrast images (left column) were superimposed with fluorescence images (middle column) to observe the relationship of the signals to cells (right column). Top left row of three images is wild type cells expressing full length SprB from the chromosome, with sfGFP fused after the signal peptide. All remaining rows of three images are  $\Delta sprB$  mutant cells with, or without, plasmids expressing SP-sfGFP fused to CTD<sub>SprB</sub> of the lengths indicated. All plasmids except the empty vector pCP23, and pSK62 (right, second row from bottom) also express SprF, to facilitate secretion. Anti-GFP was added to all cells except for those in the bottom right row. For additional controls and experimental results see Figs. S6-S8, and Fig. 3 and 4 in the main text.

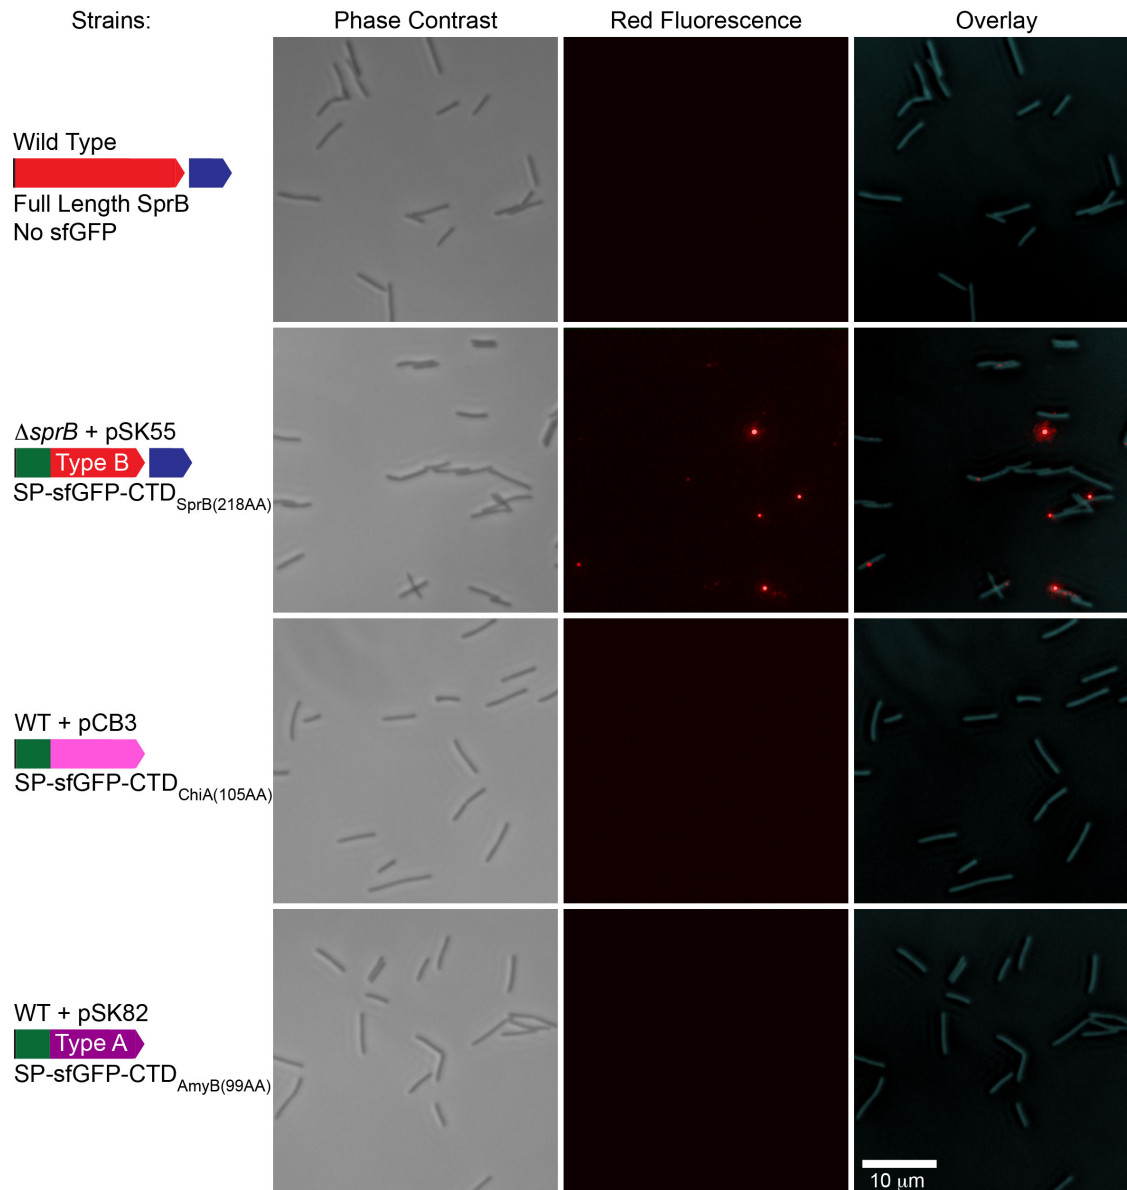

**Figure S6. C-terminal regions of the soluble secreted proteins ChiA and AmyB fused to sfGFP do not result in attachment to the cell surface.** Cells expressing SP-sfGFP fused to C-terminal regions (CTDs) of SprB, ChiA, and AmyB that are known to facilitate secretion were exposed to anti-GFP and 2<sup>o</sup> antibody fused to Alexa Fluor 594 and observed by fluorescence microscopy to detect sfGFP exposed on the cell surface. Exposure times for fluorescence images were all 33 msec. Phase contrast images were superimposed with fluorescence images to observe the relationship of the signals to cells. Top row is wild type (WT) cells with no sfGFP. The remaining rows are  $\Delta sprB$  mutant cells or wild type cells with plasmids expressing SP-sfGFP fused to CTD<sub>SprB</sub>, CTD<sub>ChiA</sub>, or CTD<sub>AmyB</sub> as indicated. Blue arrows indicate that SprF is expressed from the chromosome (top row) or from plasmid pSK55 (second row) to facilitate secretion. SprF is not needed to facilitate secretion of SP-sfGFP-CTD<sub>ChiA</sub> or SP-sfGFP-CTD<sub>AmyB</sub>, as previously indicated, and these are secreted as soluble proteins, as are full length ChiA and AmyB (1-3). ‘Type B’ indicates Type B CTD. ‘Type A’ indicates Type A CTD.



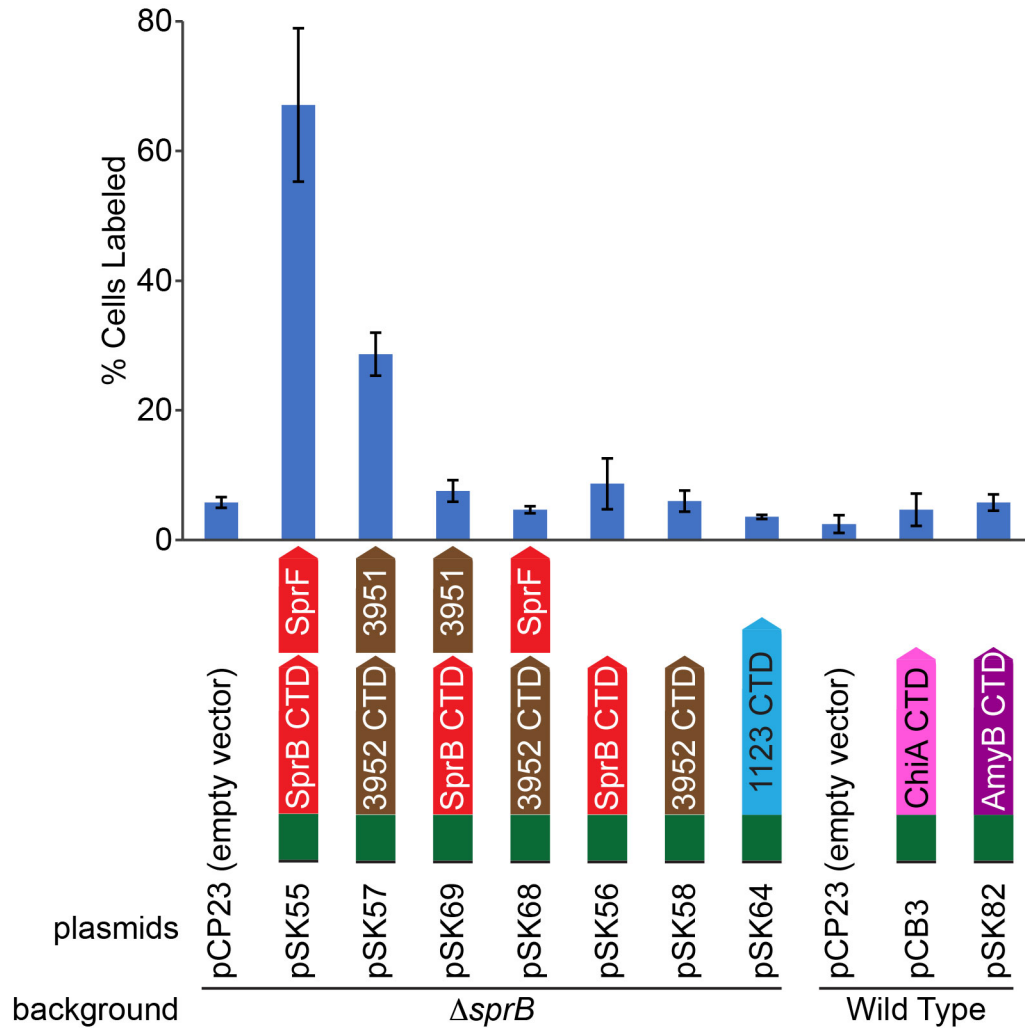

**Figure S7. Labeling of cell surface localized sfGFP fused to T9SS CTDs.** Cells expressing SP-sfGFP fused to C-terminal regions (CTDs) of SprB (218 AA), Fjoh\_3952 (228 AA), Fjoh\_1123 (238 AA), ChiA (105 AA) and AmyB (99 AA) were exposed to anti-GFP and secondary antibody fused to Alexa Fluor 594 and observed by fluorescence microscopy to detect sfGFP exposed on the cell surface. Percent of labeled cells was determined by examining three independent samples of 150 cells from each strain. Error bars indicate standard deviations from three measurements. All Type B CTD sfGFP fusions were expressed from their respective plasmids in the  $\Delta sprB$  mutant. The ChiA and AmyB CTD sfGFP fusions were expressed from their respective plasmids in wild type cells.



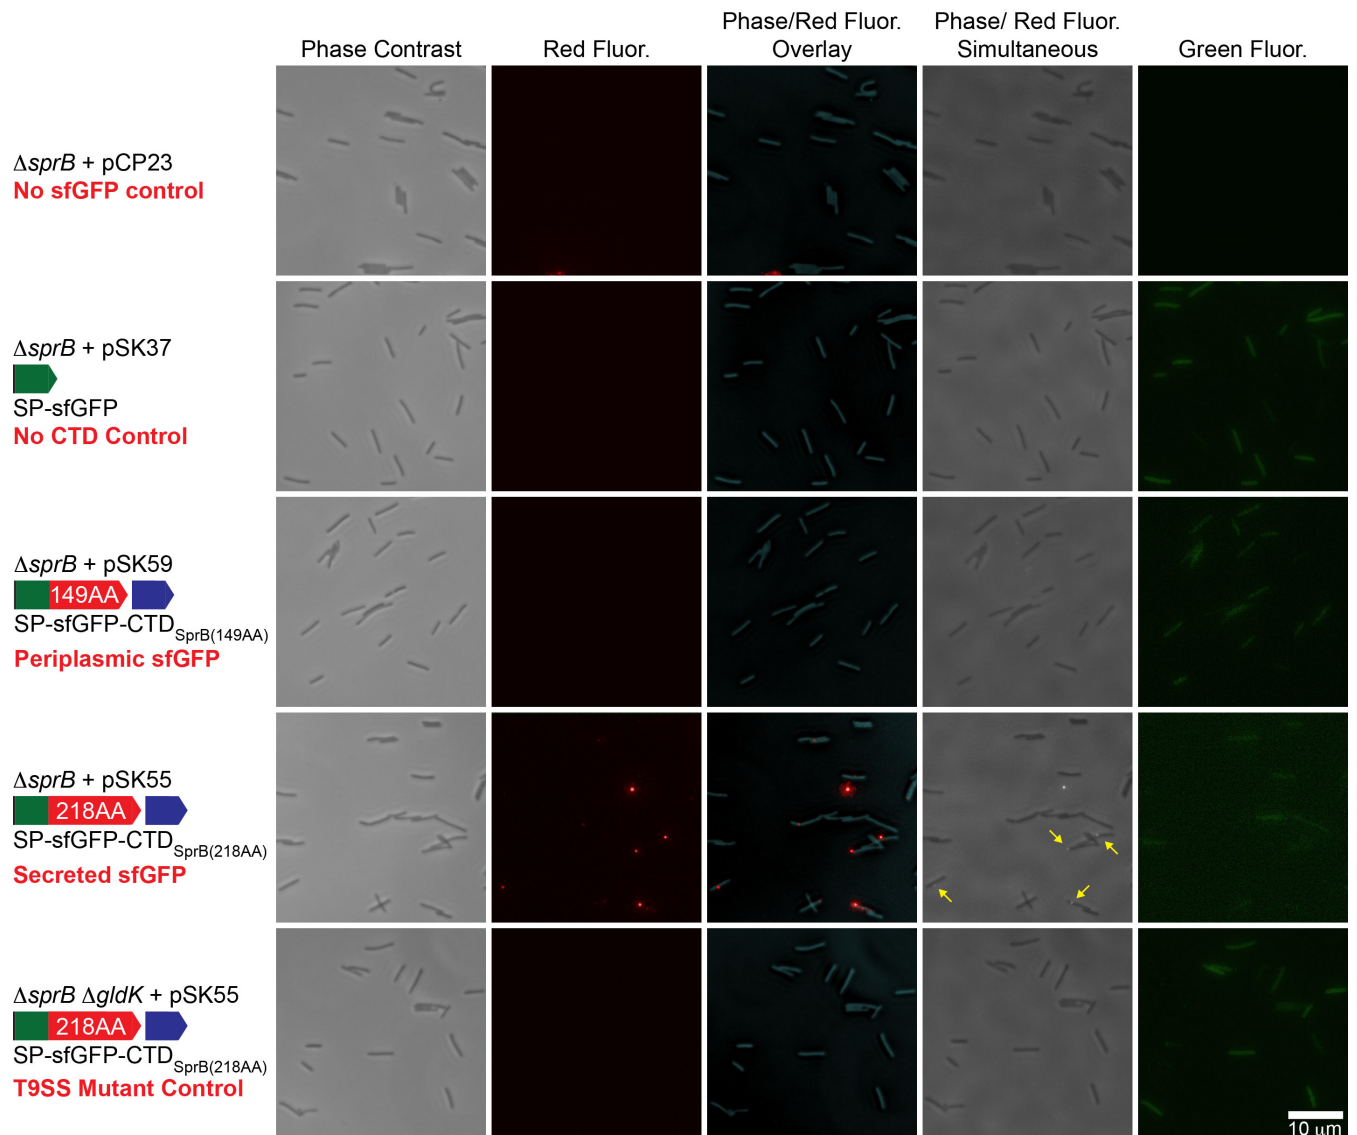

**Figure S8. Detection of red and green fluorescence with no overlap, and demonstration of simultaneous phase contrast and fluorescence microscopy.** Cells of the  $\Delta sprB$  mutant CJ1922 expressing SP-sfGFP fused to C-terminal regions (CTDs) of SprB were exposed to anti-GFP and secondary antibody fused to Alexa Fluor 594 and observed by fluorescence microscopy to detect sfGFP exposed on the cell surface. Exposure times for fluorescence images were all 33 msec. Phase contrast images (left column) were superimposed with fluorescence images to generate overlay images (third column). The fourth column illustrates detection of cells and fluorescent signals by simultaneous phase contrast and fluorescence microscopy (yellow arrows point to signals), which was used to monitor movement of signals in Movies S1 to S3. Green fluorescence (right column) demonstrated the presence of sfGFP in all cells except those of the ‘No sfGFP’ control, and demonstrated that surface localized sfGFP (red fluorescence) and total sfGFP (green fluorescence) could be separately detected. All plasmids except pCP23 (empty vector) expressed SP-sfGFP (green), in some cases fused to CTD<sub>SprB</sub> of different lengths (red), and with or without SprF (blue) as shown by the cartoons. The same region is shown in all five panels of a row. For related experimental results see Figs. S5 and S6, and Fig. 3 in the main text.

*SprF*  
*Fjoh\_1646*  
*Fjoh\_1677*  
*Fjoh\_1986*  
*Fjoh\_2274*  
*Fjoh\_3477*  
*Fjoh\_3951*  
*Fjoh\_3972*  
*Fjoh\_4539*  
*Fjoh\_4749*  
*SprD N-terminus*  
*P. gingivalis PorP*

```

MM L S K K I I T M K K F I L S L V L M A V T T S - - - V S Q E L N L - - - - - P V F T Q Y L A D N P F V L S P A Y A G I G D N L R I R A - N G L T Q W I
G L D G A P E T S T F S V N T P L T - - - N S N L G L G V S L V N D K I - - - G P T N E N T L S A D L S Y S I I P T S E S F K - - - - - L S F G I K A T A
M K T K I N I I L T L F I I T I F L E R A - - - - Y G Q Q - T - - - - - P V V S D Y L S D N Y Y L I H P S M A G A A N C A K I R L - T A R K Q W F
M K K L L L L I N E L F Y L S V - - - S A Q Q - D - - - - - P E Y T H Y M Y - N M S V V N P A Y A T G V P A M M N F G A L Y R T Q W V
M K L Y I K P L E T Y F I L I C S F I T I C A - - - S A Q Q - D - - - - - P E Y T Q Y M Y - N T M A V N P A Y A G S T G T L E A T L - L H R S Q W V
M K K I A L V L L F C S A V G - - - F A Q Q - D - - - - - A Q Y T Q Y M H - N T I N I N P A Y A G S R G V M S T F G - L Y R T Q W V
M I K N I N K I T F T I T I T M L S V F G V - - - A A Q Q - D - - - - - P Q Y T Q Y M Y - N T L S V N S A Y A G S L G H L A I T G - I Y R T Q W I
M R T K L F F F V I M E V T I A G - - - Y A Q Q - D - - - - - A Q F T Q Y M Y - N T I N I N P A Y A G S R G A L S I F G - L Y R T Q W I
M K L K L F T I T I A C C L F T K - - - - A R A Q - D - - - - - P I F T Q Y F L - I P E T L N P G F T F M E T T Y A G I - I H R E Q W P
M K K I L L L F I T L F C G F S C L L - - - V S Q E K N E N G V V S F S M P I R N S L K F - N R Y L I N P T F S F V R E S N P Y A S F Y N K R Q W V
M H K S F R S L I L L L L L T V A G G E D I F A Q Q - - - D - - - - - L L L A Q Y T R - A Y G Y Y N P A Y A G M R K E I F I T A - L H N R Q W E

```

*SprF*  
*Fjoh\_1646*  
*Fjoh\_1677*  
*Fjoh\_1986*  
*Fjoh\_2274*  
*Fjoh\_3477*  
*Fjoh\_3951*  
*Fjoh\_3972*  
*Fjoh\_4539*  
*Fjoh\_4749*  
*SprD N-terminus*  
*P. gingivalis PorP*

```

G I T K D A P Q N Q S L Y A D F R I - - - L D R S G V G I S M Y N D K N - - - G Y T K Q T G A K V S F A H H L I L D Y Y G E - - - - - Q Y L S F G L S Y N F
G L D G A P E T S T F S V N T P L T - - - N S N L G L G V S L V N D K I - - - G P T N E N T L S A D L S Y S I I P T S E S F K - - - - - L S F G I K A T A
G Q E D A P S L Q T L S F N G R V - - - G E R S G A G I I V F N D K N - - - G Y H S E K G V K L T Y A H H I M E S R D E L - - - - - D L N Q L S F G I S G G L
S V E G S P K N F D L S V N K L T W - - - G E K T G L A A G I S H D Q I - - - G V I N T T S F T S Y S Y K I Y Y D S D Y - - - - - K Y G K W W A Y D P S I S F G V T A G A
G A V G A P K T F T F E G H T A T - - - T D K I E A G L S F I S D D I G D G A K K E N N I Y A D F A Y V L N L G G K N K - - - - - L S L G L K A G F
G I S G A P E T Q S F S T H G P L R - - - N E K V G L G L S I V N D K I - - - G P S N E L Y L D G N F S Y S L P L G Y E K R - - - - - L A F L G L K A G M
G L D G A P E T S T L S L N T P I N - - - S S N V G L G F S L V N D K I - - - G P T T E N N F S V D F S Y S I Q T S A T A K - - - - - L S F G I K G S A
G L E G A P N T Q S F T L D T P I - - - A K N L G L G L S V V S E E I - - - G P S E E Q Y I D A N F S Y T I Q S G Q T Y K - - - - - L S F G L K G G G
G L D G A P E T S S F S I N T P I N - - - N S N L G V G L S L V N D K I - - - G P T N E N N I S A D L S Y T V Q T S A D F K - - - - - L S F G I K G T A
E L D L R I D T D Y A F V N T W S D - - - S M N S G L G I S F L N Q R E N V I N Y N F S O L N A N Y A Y K V R L N D Y W E - - - - - F R P G I E A G F
Q F E N A P Q T Y L A N Y S G R F - - - R E N E A F A G L F Q Q N Y - - - G L M T V F G G V Y N F A H N I V L Q E D S N - - - - - L T F G L N V G A
G M P R S P K S F V V L A D A P I R F D R E H G V G V R V T E T R - - - G L F A I N E L M G Q Y A F K Q K L F G G D - - - - - L S V A L Q A G L

```

*SprF*  
*Fjoh\_1646*  
*Fjoh\_1677*  
*Fjoh\_1986*  
*Fjoh\_2274*  
*Fjoh\_3477*  
*Fjoh\_3951*  
*Fjoh\_3972*  
*Fjoh\_4539*  
*Fjoh\_4749*  
*SprD N-terminus*  
*P. gingivalis PorP*

```

N I F R I D I D E F N T I - E H P T L D P S V T D N R Y T T N N - - - - - N F D I S A L Y R N K N F Y I T S F N A N N V I K K N T N K Y R G V E - - - - -
N L F N L D A S K L S Y E D Q N D E L F Q D I K - N K E T P - - - - - N I G A G I Y W H S D R A V L G L S V P N F I - E T N R Y D N D - - - - - V A I
T Q N Q L D E T K F G N V F - - - D P I V F G S I Q K D S Y F - - - - - N L D T G A S Y N F L D F Y A H A T V Q G V L E T R R E L Y D Y E - - - - -
M I Y N E N L T R L G I E N - - - D P E F Q E N I - N S E T P - - - - - T F G V G F L Y N R D Q I Y F G L S S P N L L - - - S S A F N S S N N - - - - -
S S I Q S N F G R F R T D P Q T D F A S E N I - N A T K P - - - - - N I G V G A Y Y F R D N L Y I G L S A P N L L - - - K S K Y I E E K S G I N A F
R M L N I D W S K G R Y Y D - - - N T D V L L N Q N I D N - - - - - A V G A G V Y Y Y T E K M V L G F S I P S F I - - - E N N Y D D V Q - - - E S I
N I F N L D P N K L T P E H - - - Q G D P Q F S D F K - N K F S P - - - - - N V G A G V Y W H S D K G Y I G L S V P N F I - - - Q T N R Y D D N D - - - V A I
R V I N I D W T K G S H K D - - - P D V Q F R E N I N K F L P - - - - - N V G A G L Y W H G E R D V I G I A I P N F L T R E R Y N Y D D I A - - - D D L
N I F N L D V N K L P S E - - - Q G D P Q F Q D L N - N K F S P - - - - - N V G A G V Y W H S D K A Y I G L S V P N F I - - - E T N R Y S D N D - - - I A I
G L K S F A F Q N L L E D - - - Q I N I R T G V I N T S S M D P M L L N R K A T F F D V S A G M V F N T D K A W I G L S M K H I N R P N I A F S S E G N - - - - -
Y Q S G L N K G K I V T D D - - - M D I L N G D Y P S N M L L - - - - - T V N P G I N Y G T I T F L D F G L S V N N L I - - - L Y N F G S G M V K E D P
V N T A F D G T K V E L E T - E N D P A T P L T K V S G K A F - - - - - D I G A G I Y Y R R K E L Y V G F S S T H I T A P A I P L N E Q Y I - - - - -

```

*SprF*  
*Fjoh\_1646*  
*Fjoh\_1677*  
*Fjoh\_1986*  
*Fjoh\_2274*  
*Fjoh\_3477*  
*Fjoh\_3951*  
*Fjoh\_3972*  
*Fjoh\_4539*  
*Fjoh\_4749*  
*SprD N-terminus*  
*P. gingivalis PorP*

```

P D L L S N Y Q V Y T G M I F K D A E N R R I E Y E P S I Y Y Q Y F A S D R R S T T D F N - - - F K Y R R Y N R Y E D Y Y W I G V S Y R - - - F L N D Q F P - - - - -
F K E K I N Y Y F A G Y V F N L D H L E Y I K F K P A L L T K M V E G A - - - - - P L Q - - - V D V S G N F M F E N D K F V L G I A Y R - - - - -
S D N L R K V L F S A G Y V F - - - G K R D K I T W E P S I L F O Y F D Q T Q K S I D L N - - - L K A Y K N M D E G S - L W A A L S Y R R S F D G A Q Y S S G S G V
T H L Q N L D E T K F G N V F - - - D P I V F G S I Q K D S Y F - - - - - P F Q - - - A D L N L L I N Y K N K V E F G G G Y R - - - - -
G A E E I H T F L T A G Y V F Q V N - - - N M W K I K P A F M S K F V K G A - - - - - P I T - - - L D V T A N V Y N E K F E F G A A Y R - - - - -
D Y D R L H Y Y L M G Y V F D L N - - - P N L K F K P A F L G K A V N G A - - - - - P L T - - - A D V S A N F M I N E K F V I G G S Y R - - - - -
F K E Q I N Y Y L I A G Y V F N L D R Y E T I K F K P A I L G K M V E G S - - - - - P L Q - - - L D A S A N F M D N K F V V G V S Y R - - - - -
V N E R M H V Y L I G G I V F D L S - - - A H T K F K P A V L Y K V V A G A - - - - - P L I - - - A D F S A N F M F N N A I T L G A S Y R - - - - -
Y K D I N Y Y L M A G Y V F D L D K L Q Y T K F K P A V L T K M V E G A - - - - - P L Q - - - V D V S A N F M F T D K L V L G V A Y R - - - - -
V P L N T F F S L S A G Y E F L I I D Y I D V L L L P Y E T K F F L T S N Y M Q Q G R Y N R L D L G A S I L F E K I F F G A T A V T - - - - - N P A K N G A
E R A I Q L H A M Y T G Y I D T Y G F F D R S K F S G I T R E L K K D K - - - - - T V I S G L A M L A L K O G V W A Q A G V N - - - - -
L D L T R H Y Y L L A G Y N I R - S I Y S L F A W H P S I - F A A T D G H - - - - - S S R - - - L D V T M G M S Y N N R F F A S L M Y R - - - - -

```

*SprF*  
*Fjoh\_1646*  
*Fjoh\_1677*  
*Fjoh\_1986*  
*Fjoh\_2274*  
*Fjoh\_3477*  
*Fjoh\_3951*  
*Fjoh\_3972*  
*Fjoh\_4539*  
*Fjoh\_4749*  
*SprD N-terminus*  
*P. gingivalis PorP*

```

- - - K P L S V G P M A G F M K S K - F Y F G Y S Y Q V M F N D L G A Y N T G T H V V T I G F D F - L Q S - I S N C P C T Q S P V H D
- - - W S A S V S A M A G F Q V T K G M Y I G Y G Y D H E T I Q L R K Y N S G S H E I F L R F D F - F N N - Y S K L - - - T S P R F F
S S Q K L Q Y I T P I V G V N F K N - F M F A Y T Y S Q V T G D V K F D T G G Y H Q I T L G I N L - F C R - K E R Y D C - N C P A V N
- - - T S K T L N F L A G F H L S D N F R V I C T Y N K S I D N V - - - V I P D T F G L V L N Y - - - - - R A G K G F
- - - I D D S V S A L F N I N V T P S L R V G Y A Y D Y T L T N E G Q F N S G T H E I M L L F D L D L L G - K G F D - - - K S P R F F
- - - T D D S I T S I L A G F Q I S P S F Y L G Y A F D Y T V G G L N K Y N D G T H E F I L R Y S L - N K N - O N K I - - - K S P R F F
- - - W S A A L S A L A G F Q I N K S M Y I G Y A Y D R E T T K L N N Y N S G S H E I F L R F E F - M K G - Y N R I - - - T S P R F F
- - - T G D S V S A M A S L Q I T P Q F L V G Y A Y D Y T T E L Q T Y N S G T H E I M L R F E L - V S R - K K G L - - - K S P R F F
- - - W S A S L S A M A G F Q I T D G L Y I G Y G Y D R E T T K L N N Y N S G S H E I F L R Y E F - F K N - N G K M - - - T P P R F F
N G D L M T S V N L L T G L Q Y E H - L R L G F S Y D N T T K I G K - T G G I Y E L S L T Y Q F D L R R - K C F - - - G C P N Y S G N
- - - T L Y C V S A G L G I N L S P S I A I E Y N Y E R G M G N F T N - M G G S H E F A I A Y R F K N R N - Y Y Y G D D D E G S I I D P S
- - - P T Q A V G V S L G M Q L G K - F Y A G Y A F E W P T S V L A K A S W G S H E L L V S Y S F P L S N T K N R D A K Y K S I T R F L

```

**Figure S9. Alignment of *F. johnsoniae* SprF-like proteins and *P. gingivalis* W83 PorP.**

Protein sequences were aligned using MUSCLE. Dark shading indicates identical amino acids and light shading indicates similar amino acids. Proteins examined experimentally in this study were SprF and Fjoh\_3951. The entire protein sequences were used in the alignment, except for SprD for which only the N-terminal 320 amino acids of the 1588 amino acid protein were used.

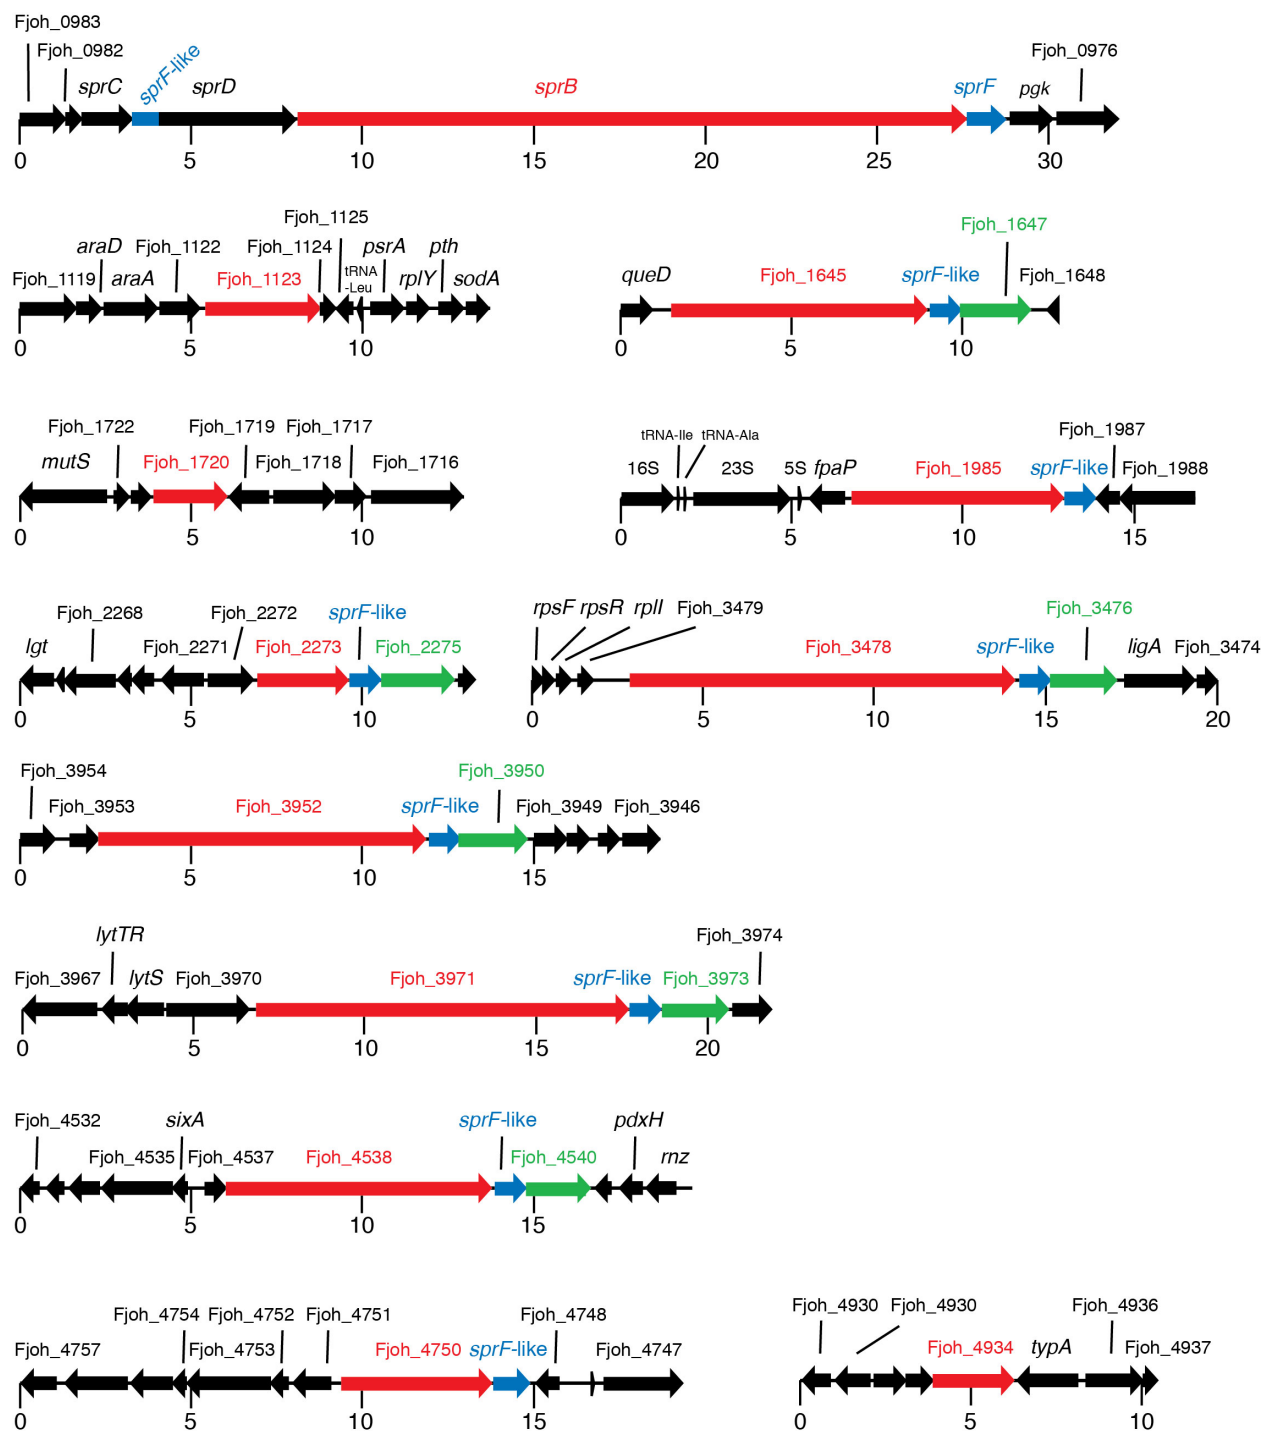

**Figure S10.** *F. johnsoniae* genes encoding type B CTD-containing proteins (red). *porP/sprF*-like genes are shown in blue, and PG1058-like genes are shown in green. One additional *porP/sprF*-like gene (*Fjoh\_1677*) is present in the genome but is not shown here because it is not located adjacent to a gene encoding a type B CTD-containing protein.

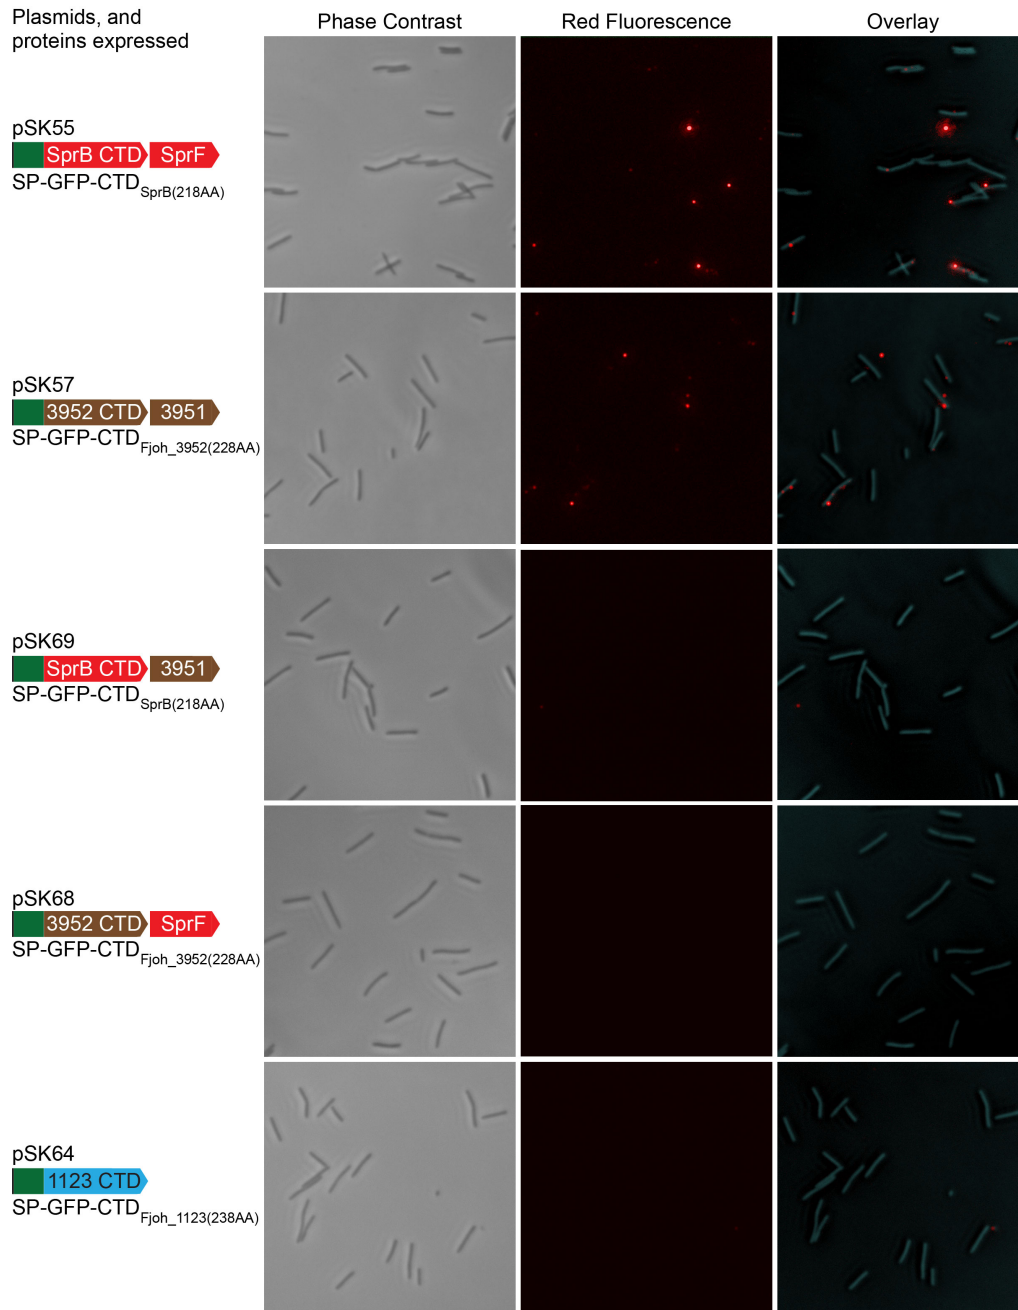

**Figure S11. Fusion of the C-terminal region of Fjoh\_3952 to sfGFP and co-expression with the cognate SprF-like protein Fjoh\_3951 results in attachment of sfGFP to the cell surface.** Cells expressing SP-sfGFP fused to C-terminal regions (CTDs) of SprB, Fjoh\_3952, or Fjoh\_1123 were exposed to anti-GFP and secondary antibody fused to Alexa Fluor 594 and observed by fluorescence microscopy to detect sfGFP exposed on the cell surface. Exposure times for fluorescence images were all 33 msec. Phase contrast images (left column) were superimposed with fluorescence images (middle column) to observe the relationship of the signals to cells (right column). All panels are  $\Delta sprB$  mutant cells with plasmids indicated expressing SP-sfGFP fused to CTD<sub>SprB(218AA)</sub>, CTD<sub>Fjoh\_3952(228AA)</sub>, or CTD<sub>Fjoh\_1123(238AA)</sub> with or without a PorP/SprF-like protein (either SprF or Fjoh\_3951) as shown. Bar indicates 10  $\mu$ m and applies to all panels.

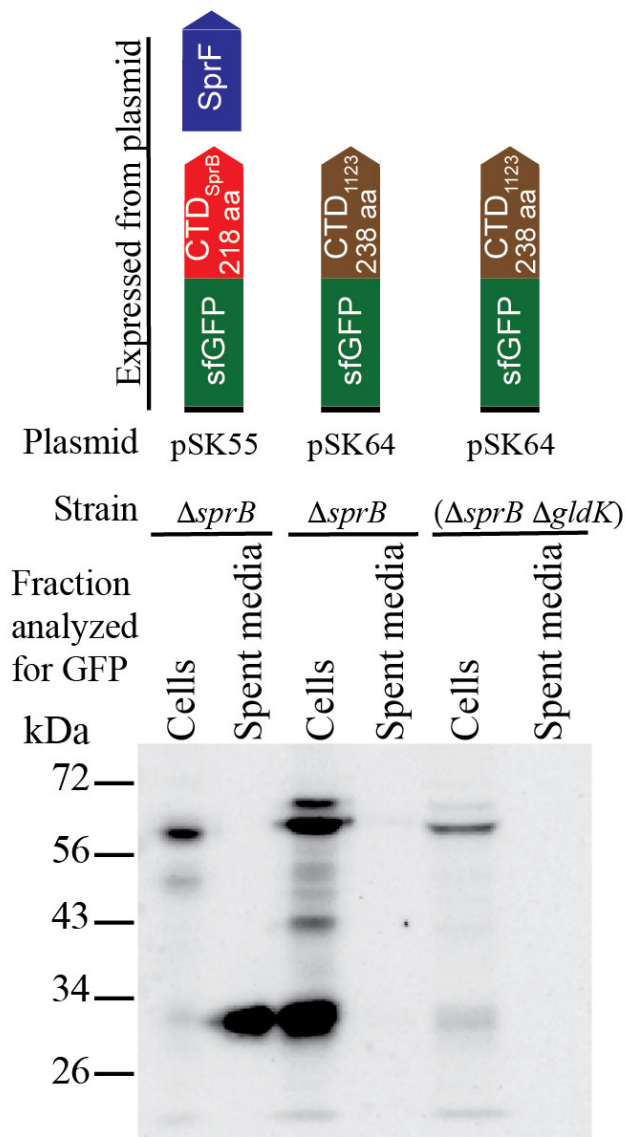

**Figure S12. The type B CTD of Fjoh\_1123 is not sufficient to target sfGFP for secretion.** To determine if Fjoh\_1123 CTD can target sfGFP for secretion, cells of  $\Delta sprB$  and of T9SS mutant  $\Delta sprB \Delta gldK$ , carrying plasmids that expressed SP-sfGFP fused to 238 amino acids of Fjoh\_1123 (pSK64) were analyzed. The culture supernatant (spent medium) and intact cells were analyzed for sfGFP by western blot using anti-GFP antiserum. Whole cell samples corresponded to 10  $\mu$ g protein per lane and samples from spent media corresponded to the volume of spent medium that contained 10  $\mu$ g protein before the cells were removed.

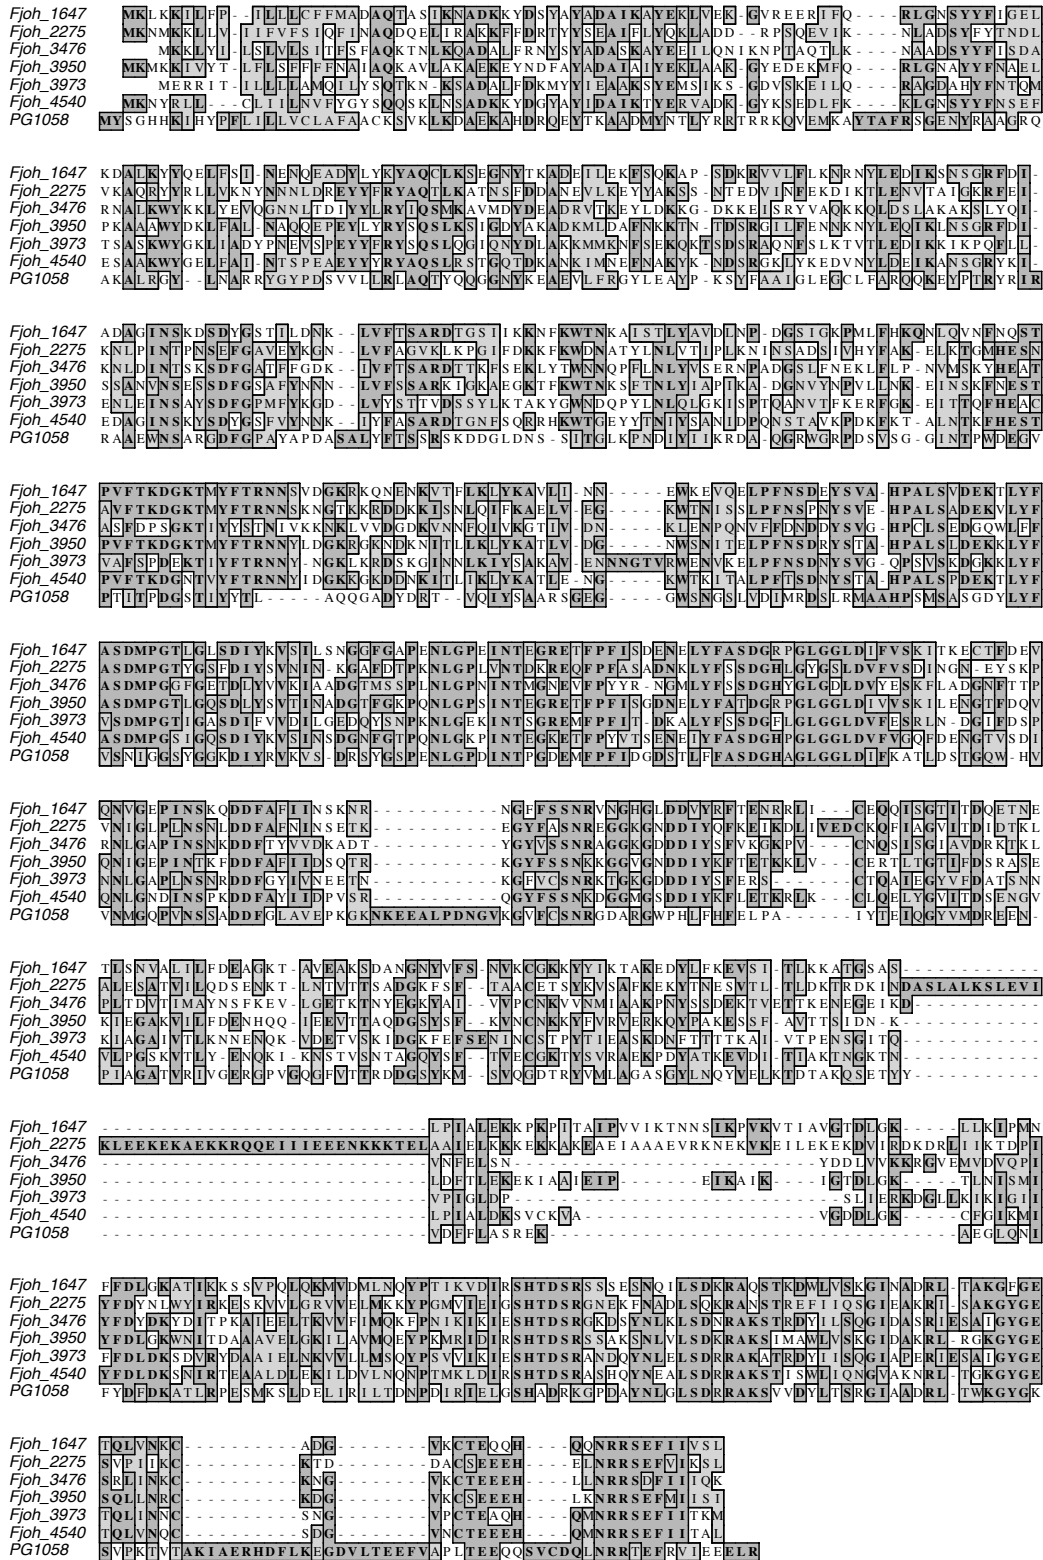

**Figure S13. Alignment of *F. johnsoniae* proteins related to *P. gingivalis* W83 PG1058.** Protein sequences were aligned using MUSCLE. Dark shading indicates identical amino acids and light shading indicates similar amino acids. The entire protein sequences were used in the alignments.

**Table S1. *F. johnsoniae* T9SS type A CTD-containing proteins<sup>1</sup>.**

| Locus tag | Molecular Mass (kDa) | Gene name   | Domains                                                  | Known or predicted function                                     |
|-----------|----------------------|-------------|----------------------------------------------------------|-----------------------------------------------------------------|
| Fjoh_0074 | 123.1                |             | endonuclease/exonuclease/phosphatase                     | nuclease/phosphatase                                            |
| Fjoh_0547 | 12.6                 |             |                                                          |                                                                 |
| Fjoh_0549 | 59.3                 |             | CARDB, 2 copies                                          | adhesin                                                         |
| Fjoh_0707 | 83.7                 |             |                                                          |                                                                 |
| Fjoh_0798 | 95.7                 |             | Metallo-peptidase M12B<br>Proprotein convertase          | peptidase                                                       |
| Fjoh_0808 | 154.0                | <i>remA</i> | Gal_Lectin                                               | galactose/rhamnose-binding lectin, gliding motility adhesin (4) |
| Fjoh_0848 | 54.2                 |             | TPR_2; TPR_8; TPR_16                                     |                                                                 |
| Fjoh_0886 | 99.1                 |             | Thermolysin, peptidase M4<br>fn3                         | peptidase                                                       |
| Fjoh_1022 | 51.1                 |             | GH8                                                      | glycoside hydrolase                                             |
| Fjoh_1188 | 152.7                |             | LRR_4                                                    |                                                                 |
| Fjoh_1189 | 181.4                |             | RCC1 (7 copies)<br>SprB repeat (2 copies)<br>Laminin G_3 | Lectin,<br>Possible motility adhesin                            |
| Fjoh_1208 | 112.5                | <i>amyB</i> | $\alpha$ amylase GH13<br>Big_2 (3 copies)<br>CBM26       | $\alpha$ amylase (2, 3)                                         |
| Fjoh_1231 | 97.8                 |             | pectate lyase<br>CBM77                                   | pectate lyase                                                   |
| Fjoh_1269 | 94.3                 |             | SprB repeat (5 copies)                                   | Possible motility adhesin                                       |
| Fjoh_1408 | 106.0                |             | $\alpha$ amylase<br>GH13                                 | $\alpha$ amylase                                                |
| Fjoh_1905 | 75.1                 |             | GH30<br>RicinB_lectin_2 (2 copies)<br>CBM13              | glycoside hydrolase                                             |
| Fjoh_2150 | 39.0                 |             |                                                          |                                                                 |
| Fjoh_2336 | 14.0                 |             |                                                          |                                                                 |
| Fjoh_2338 | 12.9                 |             | DUF3244                                                  |                                                                 |
| Fjoh_2339 | 14.7                 |             |                                                          |                                                                 |
| Fjoh_2389 | 57.7                 |             | Peptidase S8                                             | peptidase                                                       |
| Fjoh_2456 | 100.1                |             | PL1                                                      | polysaccharide lyase                                            |
| Fjoh_2666 | 61.2                 |             |                                                          |                                                                 |
| Fjoh_3203 | 104.9                |             | GH87<br>Big_2 (2 copies)                                 | Glycoside hydrolase                                             |
| Fjoh_3246 | 299.4                |             | CARDB                                                    | adhesin                                                         |
| Fjoh_3296 | 65.1                 |             |                                                          |                                                                 |
| Fjoh_3324 | 105.3                |             | Glucose-sorbosone dehydrogenase<br>CBM6<br>PKD           | Glucose-sorbosone dehydrogenase                                 |
| Fjoh_3421 | 17.8                 |             |                                                          |                                                                 |
| Fjoh_3731 | 60.5                 |             |                                                          |                                                                 |



|           |       |  |                                                                         |                              |
|-----------|-------|--|-------------------------------------------------------------------------|------------------------------|
| Fjoh_3777 | 128.1 |  | DUF676                                                                  | Possible lipase/esterase     |
| Fjoh_3855 | 31.4  |  |                                                                         |                              |
| Fjoh_4051 | 226.7 |  | SprB repeat (13 copies)                                                 | Possible motility adhesin    |
| Fjoh_4174 | 102.5 |  | RicinB_lectin_2<br>CBM6                                                 | carbohydrate binding         |
| Fjoh_4175 | 57.7  |  | GH18<br>CBM6                                                            | glycoside hydrolase          |
| Fjoh_4176 | 95.4  |  | GH64<br>beta gamma crystallin<br>RicinB_lectin_2<br>CBM13<br>CBM6       | glycoside hydrolase          |
| Fjoh_4177 | 144.9 |  | GH16<br>Discoidin                                                       | Possible glycoside hydrolase |
| Fjoh_4242 | 100.5 |  | Peptidase_S8                                                            | peptidase                    |
| Fjoh_4436 | 131.8 |  | GH27<br>CBM13<br>RicinB_lectin_2<br>SusF SusE starch binding (3 copies) | glycoside hydrolase          |
| Fjoh_4721 | 67.1  |  | endonuclease<br>fn3<br>LTD                                              | endonuclease                 |
| Fjoh_4723 | 66.0  |  | endonuclease<br>fn3<br>LTD                                              | endonuclease                 |
| Fjoh_4948 | 34.5  |  |                                                                         |                              |
| Average   | 78.8  |  |                                                                         |                              |
| Median    | 94.3  |  |                                                                         |                              |

<sup>1</sup>The T9SS type A CTD (TIGR04183) is a C-terminal domain that targets a protein for secretion by the T9SS. TIGR04183 is described as 'Por secretion system C-terminal sorting domain' on the J. Craig Venter Institute TIGR website (<http://www.jcvi.org/cgi-bin/tigrfams/index.cgi>). Each of these proteins contains an N-terminal signal peptide for export across the cytoplasmic membrane, and a T9SS type A C-terminal domain (CTD) for secretion across the outer membrane by the T9SS. In addition, they contain the conserved domains shown:

**Carbohydrate active enzymes/proteins as assigned by CAZY:** Glycoside hydrolase (GH); polysaccharide lyase (PL); carbohydrate binding (CBM) domains as assigned by CAZY (5).  $\alpha$  amylase also assigned based on (pfam00128); pectate lyase also assigned based on (pfam00544).

**Other potential carbohydrate active/binding proteins:** Fjoh\_4177 assigned as GH16 based on relationship to (pfam00722); Galactose/rhamnose-binding lectin (Gal\_Lectin, pfam02140); RicinB\_lectin\_2 (pfam14200); SusF SusE starch binding (pfam16411); Glucose-sorbose dehydrogenase (pfam07995).

**Peptidases:** Metallo-peptidase M12B (pfam13583); Proprotein convertase (pfam01483); Thermolysin, peptidase M4 (pfam07504, pfam01447, pfam02868); Peptidase\_S8 (pfam00082).

**Other Enzymes:** Endonuclease/exonuclease/phosphatase family (IPR005135); endonuclease (pfam04231).

**Other:** Cell adhesion related domain (CARDB, pfam07705); tetratricopeptide repeat domains: TPR\_2 (pfam07719), TPR\_8 (pfam13181), and TPR\_16 (pfam13432); Fibronectin type III domain (fn3; pfam00041); leucine rich repeat 4 (LRR\_4, pfam12799); Laminin\_G\_3 (pfam13385); SprB repeat (pfam13573); Regulator of chromosome condensation (RCC1, pfam00415); bacterial Ig-like domain (Big\_2, pfam02368); PKD (pfam00801); beta gamma crystallin (pfam00030); Discoidin (pfam00754); Lamin Tail Domain (LTD, pfam00932); DUF3244 (pfam11589); DUF676 (pfam05057).

**Table S2. *F. johnsoniae* T9SS Type B CTD-containing proteins<sup>1</sup>**

| Locus tag | Molecular Mass (kDa) | Gene name   | Domains                                                           | Function or predicted function         |
|-----------|----------------------|-------------|-------------------------------------------------------------------|----------------------------------------|
| Fjoh_0979 | 672.0                | <i>sprB</i> | SprB repeat (20 copies)                                           | Gliding motility adhesin (6)           |
| Fjoh_1123 | 121.9                |             | PKD domain                                                        | Possible adhesin                       |
| Fjoh_1645 | 258.1                |             | Hyalin repeat (3 copies)<br>DUF11 (2 copies)                      | Possible adhesin                       |
| Fjoh_1720 | 78.5                 |             | C-type lectin                                                     | Predicted carbohydrate-binding adhesin |
| Fjoh_1985 | 221.0                |             | Hyalin repeat (8 copies)<br>FG-GAP repeat of integrins (2 copies) | Possible adhesin                       |
| Fjoh_2273 | 93.3                 |             |                                                                   |                                        |
| Fjoh_3478 | 386.0                |             | DUF11                                                             |                                        |
| Fjoh_3952 | 330.6                |             | VCBS repeat<br>DUF11 (3 copies)                                   | Possible adhesin                       |
| Fjoh_3971 | 375.3                |             | DUF11 (16 copies)                                                 |                                        |
| Fjoh_4538 | 271.0                |             | LRR_adjacent (8 copies)<br>VWA_2<br>Collagen binding protein, Cna | Possible adhesin                       |
| Fjoh_4750 | 158.1                |             | PKD domain (3 copies)<br>SprB repeat (3 copies)                   | Possible gliding motility adhesin      |
| Fjoh_4934 | 84.7                 |             |                                                                   |                                        |
| Average   | 378.4                |             |                                                                   |                                        |
| Median    | 239.6                |             |                                                                   |                                        |

<sup>1</sup>The T9SS type B CTD (TIGR04131) is a C-terminal domain that targets a protein for secretion by the T9SS. TIGR04131 is described as 'gliding motility-associated C-terminal domain' on the J. Craig Venter Institute TIGR website (<http://www.jcvi.org/cgi-bin/tigrfams/index.cgi>). Each of these proteins contains an N-terminal signal peptide for export across the cytoplasmic membrane, and a T9SS type B C-terminal domain (CTD) for secretion across the outer membrane by the T9SS. In addition, individual proteins contain the conserved domains shown: SprB repeat (pfam13573); PKD domain (IPR000601); Hyalin repeat (pfam02494); C-type lectin (IPR016186, IPR016187, IPR001304); FG-GAP repeat of integrins (pfam01839); VCBS repeat (TIGR01965); LRR\_adjacent (pfam08191); DUF11 (pfam01345); von Willebrand factor type A domain, VWA\_2 (pfam13519); Collagen binding protein Cna (IPR008970).

**Table S3. Prevalence of T9SS genes, CTD-encoding genes and *porP/sprF*-like genes in 104 members of the phylum *Bacteroidetes*<sup>a</sup>**

| Genome                                           | T9SS components |           |           |           |           | CTDs       |            | porP/sprF-like genes | porP/sprF-like genes that have type B CTD-encoding genes immediately upstream |
|--------------------------------------------------|-----------------|-----------|-----------|-----------|-----------|------------|------------|----------------------|-------------------------------------------------------------------------------|
|                                                  | GldK            | GldL      | GldM      | GldN      | SprA      | Type A CTD | Type B CTD |                      |                                                                               |
|                                                  | TIGR03525       | TIGR03513 | TIGR03517 | TIGR03523 | TIGR04189 | TIGR04183  | TIGR04131  | TIGR03519            |                                                                               |
| <b>Class Flavobacteriia</b>                      |                 |           |           |           |           |            |            |                      |                                                                               |
| <i>Aequorivita sublithicola</i> DSM 14238        | 1               | 1         | 1         | 1         | 1         | 112        | 5          | 4                    | 3                                                                             |
| <i>Algibacter alginicyticus</i> HZ22             | 1               | 1         | 1         | 1         | 1         | 55         | 10         | 7                    | 6                                                                             |
| <i>Capnocytophaga canimorsus</i> Cc5             | 1               | 1         | 1         | 1         | 1         | 1          | 10         | 6                    | 5                                                                             |
| <i>Capnocytophaga haemolytica</i> CCG 32990      | 1               | 1         | 1         | 1         | 1         | 2          | 6          | 5                    | 3                                                                             |
| <i>Capnocytophaga ochracea</i> DSM 7271          | 1               | 1         | 1         | 1         | 1         | 2          | 8          | 5                    | 3                                                                             |
| <i>Capnocytophaga</i> sp. F0383                  | 1               | 1         | 1         | 1         | 1         | 2          | 7          | 5                    | 3                                                                             |
| <i>Cellulophaga algicola</i> DSM 14237           | 1               | 1         | 1         | 1         | 1         | 13         | 16         | 12                   | 8                                                                             |
| <i>Cellulophaga lytica</i> DSM 7489              | 1               | 1         | 1         | 1         | 1         | 14         | 13         | 10                   | 6                                                                             |
| <i>Chryseobacterium</i> sp. IHB B 17019          | 1               | 1         | 1         | 1         | 1         | 83         | 18         | 1                    | 0                                                                             |
| <i>Chryseobacterium</i> sp. StRB126              | 1               | 1         | 1         | 1         | 1         | 101        | 10         | 1                    | 0                                                                             |
| <i>Croceibacter atlanticus</i> HTCC2559          | 1               | 1         | 1         | 1         | 1         | 45         | 8          | 4                    | 4                                                                             |
| <i>Dokdonia</i> sp. 4H-3-7-5                     | 1               | 1         | 1         | 1         | 1         | 15         | 10         | 7                    | 5                                                                             |
| <i>Dokdonia</i> sp. PRO95                        | 1               | 1         | 1         | 1         | 1         | 17         | 10         | 7                    | 5                                                                             |
| <i>Elizabethkingia meningoseptica</i> FMS-007    | 0               | 0         | 0         | 0         | 0         | 0          | 0          | 0                    | 0                                                                             |
| <i>Elizabethkingia miricola</i> BM10             | 0               | 0         | 0         | 0         | 0         | 0          | 0          | 0                    | 0                                                                             |
| <i>Flavobacteriaceae</i> bacterium 3519-10       | 1               | 1         | 1         | 1         | 1         | 55         | 6          | 1                    | 0                                                                             |
| <i>Flavobacterium brachiophilum</i> FL-15        | 1               | 1         | 1         | 1         | 1         | 37         | 10         | 3                    | 3                                                                             |
| <i>Flavobacterium columnare</i> ATCC 49512       | 1               | 1         | 1         | 1         | 1         | 35         | 7          | 6                    | 4                                                                             |
| <i>Flavobacterium indicum</i> GPTSA100-9         | 1               | 1         | 1         | 1         | 1         | 43         | 16         | 5                    | 5                                                                             |
| <i>Flavobacterium johnsoniae</i> ATCC 17061      | 1               | 1         | 1         | 2         | 1         | 40         | 12         | 11                   | 9                                                                             |
| <i>Flavobacterium psychrophilum</i> JIP02/86     | 1               | 1         | 1         | 1         | 1         | 38         | 10         | 7                    | 5                                                                             |
| <i>Fluviicola taffensis</i> DSM 16823            | 1               | 1         | 2         | 2         | 1         | 180        | 50         | 15                   | 9                                                                             |
| <i>Gramella forsetii</i> KT0803                  | 1               | 1         | 1         | 1         | 1         | 11         | 7          | 5                    | 4                                                                             |
| <i>Lacinutrix</i> sp. 5H-3-7-4                   | 1               | 1         | 1         | 1         | 1         | 31         | 16         | 8                    | 7                                                                             |
| <i>Lutibacter profundus</i> LP1                  | 1               | 1         | 1         | 1         | 1         | 19         | 3          | 2                    | 1                                                                             |
| <i>Maribacter</i> sp. HTCC2170                   | 1               | 1         | 1         | 1         | 1         | 10         | 13         | 8                    | 3                                                                             |
| <i>Muricauda lutaonensis</i> CC-HSB-11           | 1               | 1         | 1         | 1         | 1         | 7          | 13         | 9                    | 6                                                                             |
| <i>Muricauda ruestringensis</i> DSM 13258        | 1               | 1         | 1         | 1         | 1         | 7          | 13         | 13                   | 7                                                                             |
| <i>Myroides profundus</i> D25                    | 1               | 1         | 1         | 1         | 1         | 7          | 12         | 11                   | 10                                                                            |
| <i>Myroides</i> sp. A21                          | 1               | 1         | 1         | 1         | 1         | 4          | 7          | 8                    | 5                                                                             |
| <i>Nonlabens dokdonensis</i> DSW-6               | 1               | 1         | 1         | 1         | 1         | 85         | 17         | 5                    | 2                                                                             |
| <i>Ornithobacterium rhinotracheale</i> DSM 15997 | 1               | 1         | 1         | 1         | 1         | 6          | 2          | 1                    | 0                                                                             |
| <i>Owenweeksia hongkongensis</i> DSM 17368       | 1               | 1         | 1         | 1         | 1         | 159        | 26         | 4                    | 1                                                                             |
| <i>Polaribacter</i> sp. MED152                   | 1               | 1         | 1         | 1         | 1         | 27         | 8          | 5                    | 4                                                                             |
| <i>Riemerella anatipestifer</i> DSM 15868        | 1               | 1         | 1         | 1         | 1         | 15         | 1          | 1                    | 0                                                                             |
| <i>Robiginitalea biformata</i> HTCC2501          | 1               | 1         | 1         | 1         | 1         | 7          | 12         | 8                    | 4                                                                             |
| <i>Siansivirga zeaxanthinifaciens</i> CC-SAMT-1  | 1               | 1         | 1         | 1         | 1         | 51         | 10         | 6                    | 5                                                                             |
| <i>Weeksella virosa</i> DSM 16922                | 1               | 1         | 1         | 1         | 1         | 36         | 3          | 1                    | 1                                                                             |
| <i>Winogradskyella</i> sp. PG-2                  | 1               | 1         | 1         | 1         | 1         | 66         | 17         | 8                    | 6                                                                             |
| <i>Zobellia galactanivorans</i> DsjJT            | 1               | 1         | 1         | 1         | 1         | 29         | 17         | 14                   | 9                                                                             |
| <i>Zunongwangia profunda</i> SM-A87              | 1               | 1         | 1         | 1         | 1         | 7          | 5          | 3                    | 2                                                                             |
| <b>Class Cytophagia</b>                          |                 |           |           |           |           |            |            |                      |                                                                               |
| <i>Belliella baltica</i> DSM 15883               | 1               | 1         | 1         | 1         | 1         | 11         | 4          | 6                    | 3                                                                             |
| <i>Bernardetia litoralis</i> DSM 6794            | 1               | 1         | 1         | 3         | 1         | 52         | 11         | 5                    | 1                                                                             |
| <i>Cyclobacterium amurskyense</i> KCTC 12363     | 1               | 1         | 1         | 1         | 1         | 20         | 5          | 7                    | 3                                                                             |
| <i>Cyclobacterium marinum</i> DSM 745            | 1               | 1         | 1         | 1         | 1         | 18         | 7          | 7                    | 5                                                                             |
| <i>Cytophaga hutchinsonii</i> ATCC 33406         | 1               | 1         | 2         | 2         | 1         | 118        | 27         | 16                   | 8                                                                             |
| <i>Dyadobacter fermentans</i> DSM 18053          | 1               | 1         | 1         | 1         | 1         | 88         | 11         | 3                    | 0                                                                             |
| <i>Echinicola vietnamensis</i> DSM 17526         | 1               | 1         | 1         | 1         | 1         | 17         | 9          | 9                    | 6                                                                             |
| <i>Emticicia oligotrophica</i> DSM 17448         | 1               | 1         | 1         | 1         | 1         | 31         | 10         | 4                    | 1                                                                             |
| <i>Hymenobacter</i> sp. APR13                    | 1               | 1         | 1         | 1         | 1         | 83         | 9          | 2                    | 0                                                                             |
| <i>Hymenobacter</i> sp. DG25A                    | 1               | 1         | 1         | 1         | 1         | 54         | 6          | 3                    | 1                                                                             |
| <i>Hymenobacter</i> sp. PAMC26554                | 1               | 1         | 1         | 1         | 1         | 51         | 8          | 3                    | 1                                                                             |
| <i>Hymenobacter swuensis</i> DY53                | 1               | 1         | 1         | 1         | 1         | 100        | 8          | 3                    | 1                                                                             |
| <i>Leadbetterella byssophila</i> DSM 17132       | 1               | 1         | 1         | 1         | 1         | 17         | 4          | 4                    | 0                                                                             |
| <i>Marivirga tractuosa</i> DSM 4126              | 1               | 1         | 1         | 1         | 1         | 39         | 11         | 12                   | 7                                                                             |
| <i>Persicobacter</i> sp. JZB09                   | 1               | 1         | 1         | 1         | 1         | 32         | 3          | 4                    | 1                                                                             |
| <i>Pontibacter akesuensis</i> AKS 1T             | 1               | 1         | 1         | 1         | 1         | 47         | 11         | 8                    | 5                                                                             |
| <i>Pontibacter korlensis</i> X14-1T              | 1               | 1         | 1         | 1         | 1         | 47         | 11         | 9                    | 7                                                                             |
| <i>Rufibacter</i> sp. DG15C                      | 1               | 1         | 1         | 1         | 1         | 49         | 13         | 10                   | 7                                                                             |
| <i>Rufibacter tibetensis</i> 1351                | 1               | 1         | 1         | 1         | 1         | 56         | 11         | 9                    | 6                                                                             |

|                                                 |                 |           |           |           |            |            |           |                      |                                                                               |
|-------------------------------------------------|-----------------|-----------|-----------|-----------|------------|------------|-----------|----------------------|-------------------------------------------------------------------------------|
| <i>Runella slithyformis</i> DSM 19594           | 1               | 1         | 1         | 1         | 1          | 33         | 18        | 5                    | 1                                                                             |
| <i>Spirosoma linguale</i> DSM 74                | 1               | 1         | 1         | 1         | 1          | 53         | 14        | 4                    | 1                                                                             |
| <i>Spirosoma radiotolerans</i> DGSA             | 1               | 1         | 1         | 1         | 1          | 50         | 15        | 5                    | 2                                                                             |
| <b>Class Sphingobacteriia</b>                   |                 |           |           |           |            |            |           |                      |                                                                               |
| <i>Algoriphagus</i> sp. M8-2                    | 1               | 1         | 1         | 1         | 1          | 16         | 6         | 8                    | 5                                                                             |
| <i>Arachidicoccus</i> sp. BS20                  | 2               | 1         | 1         | 2         | 1          | 11         | 0         | 0                    | 0                                                                             |
| <i>Chitinophaga pinensis</i> DSM 2588           | 1               | 1         | 1         | 1         | 1          | 51         | 36        | 17                   | 13                                                                            |
| <i>Haliscomenobacter hydrassis</i> DSM 1100     | 1               | 1         | 1         | 1         | 1          | 144        | 36        | 14                   | 4                                                                             |
| <i>Mucilaginibacter</i> PAMC26640               | 1               | 1         | 1         | 2         | 1          | 7          | 9         | 4                    | 3                                                                             |
| <i>Niabella soli</i> DSM 19437                  | 0               | 0         | 0         | 0         | 0          | 0          | 0         | 0                    | 0                                                                             |
| <i>Niastella koreensis</i> DSM 17620            | 1               | 1         | 1         | 1         | 1          | 111        | 31        | 17                   | 12                                                                            |
| <i>Pedobacter cryoconitis</i> PAMC 27485        | 1               | 1         | 1         | 1         | 1          | 3          | 5         | 6                    | 4                                                                             |
| <i>Pedobacter heparinus</i> DSM 2366            | 1               | 1         | 1         | 1         | 1          | 8          | 13        | 10                   | 7                                                                             |
| <i>Pedobacter</i> sp. PACM 27299                | 1               | 1         | 1         | 1         | 1          | 1          | 9         | 7                    | 6                                                                             |
| <i>Pseudopedobacter saltans</i> DSM 12145       | 1               | 1         | 1         | 1         | 1          | 29         | 10        | 11                   | 10                                                                            |
| <i>Saprosira grandis</i> Lewin                  | 1               | 1         | 1         | 3         | 2          | 67         | 16        | 10                   | 2                                                                             |
| <i>Solitalea canadensis</i> DSM 3403            | 1               | 1         | 1         | 1         | 1          | 6          | 18        | 11                   | 8                                                                             |
| <i>Sphingobacterium</i> sp. 21                  | 2               | 1         | 1         | 2         | 1          | 1          | 2         | 1                    | 1                                                                             |
| <i>Sphingobacterium</i> sp. ML3W                | 1               | 1         | 1         | 1         | 0          | 1          | 0         | 0                    | 0                                                                             |
| <b>Class Bacteroidia</b>                        |                 |           |           |           |            |            |           |                      |                                                                               |
| <i>Alistipes finegoldii</i> DSM 17242           | 0               | 0         | 0         | 0         | 0          | 0          | 0         | 0                    | 0                                                                             |
| <i>Bacteroides cellulolyticus</i> WH2           | 1               | 1         | 1         | 1         | 1          | 19         | 1         | 1                    | 0                                                                             |
| <i>Bacteroides dorei</i> CLO3T12C01             | 0               | 0         | 0         | 0         | 0          | 0          | 0         | 0                    | 0                                                                             |
| <i>Bacteroides fragilis</i> NCTC 9343           | 0               | 1         | 1         | 0         | 0          | 0          | 0         | 0                    | 0                                                                             |
| <i>Bacteroides helcogenes</i> DSM 20613         | 0               | 0         | 0         | 0         | 0          | 0          | 0         | 0                    | 0                                                                             |
| <i>Bacteroides ovatus</i> ATCC 8483             | 0               | 0         | 0         | 0         | 0          | 0          | 0         | 0                    | 0                                                                             |
| <i>Bacteroides thetaiotaomicron</i> VPI-5482    | 0               | 0         | 0         | 0         | 0          | 0          | 0         | 0                    | 0                                                                             |
| <i>Bacteroides vulgatus</i> ATCC 8482           | 0               | 0         | 0         | 0         | 0          | 0          | 0         | 0                    | 0                                                                             |
| <i>Bacteroides xylanisolvens</i> XB1A           | 0               | 0         | 0         | 0         | 0          | 0          | 0         | 0                    | 0                                                                             |
| <i>Barnesiella viscericola</i> DSM 18177        | 1               | 1         | 1         | 1         | 1          | 41         | 1         | 1                    | 0                                                                             |
| <i>Draconibacterium orientale</i> FH5           | 2               | 1         | 1         | 1         | 1          | 23         | 7         | 9                    | 4                                                                             |
| <i>Odoribacter splanchnicus</i> DSM 20712       | 0               | 0         | 0         | 0         | 2          | 2          | 1         | 2                    | 0                                                                             |
| <i>Paludibacter propionicipigenes</i> DSM 17365 | 1               | 1         | 1         | 1         | 1          | 10         | 6         | 6                    | 5                                                                             |
| <i>Parabacteroides distasonis</i> ATCC 8503     | 1               | 1         | 1         | 1         | 1          | 7          | 1         | 1                    | 0                                                                             |
| <i>Porphyromonas asaccharolytica</i> DSM 20707  | 1               | 1         | 1         | 1         | 1          | 29         | 1         | 1                    | 0                                                                             |
| <i>Porphyromonas gingivalis</i> ATCC 33277      | 1               | 1         | 1         | 1         | 1          | 17         | 1         | 1                    | 0                                                                             |
| <i>Prevotella dentalis</i> EDSM 3688            | 1               | 1         | 1         | 1         | 1          | 9          | 1         | 1                    | 0                                                                             |
| <i>Prevotella denticola</i> F0289               | 1               | 1         | 1         | 1         | 1          | 8          | 1         | 1                    | 0                                                                             |
| <i>Prevotella enoeca</i> F0113                  | 1               | 1         | 1         | 1         | 1          | 4          | 1         | 1                    | 0                                                                             |
| <i>Prevotella fusca</i> W1435                   | 1               | 1         | 1         | 1         | 1          | 6          | 1         | 1                    | 0                                                                             |
| <i>Prevotella intermedia</i> 17-2               | 1               | 1         | 1         | 1         | 1          | 19         | 1         | 1                    | 0                                                                             |
| <i>Prevotella melaninogenica</i> ATCC 25845     | 1               | 1         | 1         | 1         | 1          | 14         | 1         | 1                    | 0                                                                             |
| <i>Prevotella ruminicola</i> 23                 | 1               | 1         | 1         | 1         | 1          | 1          | 1         | 1                    | 0                                                                             |
| <i>Prevotella</i> sp. F0039                     | 1               | 1         | 1         | 1         | 1          | 13         | 1         | 1                    | 0                                                                             |
| <i>Rikenellaceae</i> bacterium M3               | 0               | 0         | 0         | 0         | 0          | 0          | 0         | 0                    | 0                                                                             |
| <i>Tannerella forsythia</i> ATCC 43037          | 1               | 1         | 1         | 1         | 1          | 28         | 0         | 1                    | 0                                                                             |
| total                                           |                 |           |           |           |            |            | 527       | 314                  |                                                                               |
|                                                 | T9SS components |           |           |           |            | CTDs       |           | porP/sprF-like genes | porP/sprF-like genes that have type B CTD-encoding genes immediately upstream |
| GldK                                            | GldL            | GldM      | GldN      | SprA      | Type A CTD | Type B CTD | TIGR03519 |                      |                                                                               |
| TIGR03525                                       | TIGR03513       | TIGR03517 | TIGR03523 | TIGR04189 | TIGR04183  | TIGR04131  |           |                      |                                                                               |

<sup>a</sup>Only members of the *Bacteroidetes* with completed genome sequences were examined and only one member of each species was used. Occurrence of genes encoding T9SS components or of genes encoding proteins with T9SS-associated CTDs are shown. Tan shading indicates the presence of a gene and the number indicates the number of such genes in the genome. Genes were identified using the Integrated Microbial Genomes (IMG version 4.0.1) Function Profile Tool and using the TIGRFAM and pfam terms listed. For TIGRFAM terms the trusted cutoffs set by The Institute for Genomic Research were used as indicated in the Methods section of the main text. These may underrepresent the actual number of proteins secreted by T9SSs. For example, more than 30 proteins are thought to be secreted by the *P. gingivalis* T9SS (7), but only 18 were identified above.

**Table S4. Primers used in this study**

|      |                                                                                                                                                                                                                   |
|------|-------------------------------------------------------------------------------------------------------------------------------------------------------------------------------------------------------------------|
| 954  | 5' GCTAGT <u>CTAGATGGCGAGGAATTACCTTCTGGTGA</u> 3'; forward primer used in construction of pSK45, pSK51, pSK52 and pSK55; XbaI site underlined                                                                     |
| 955  | 5' GCTAGG <u>CATGCGGACATTTTCGGCTTGTGTAAATTCG</u> 3'; reverse primer used in construction of pSK59, pSK61 and pSK68; SphI site underlined                                                                          |
| 1302 | 5' GCTAGGG <u>ATCCCAGAAGCTACAGCGAAAGCAAAAG</u> 3'; forward primer used in construction of pYT108 and pYT296; BamHI site underlined                                                                                |
| 1305 | 5' GCTAGG <u>CATGCGAGGGTGTACACCTGACTGATTCTC</u> 3'; reverse primer used in construction of pYT112 and pYT296; SphI site underlined                                                                                |
| 1356 | 5' GCTAGT <u>CTAGATACAGGGTTGGGAATGGTAGGTA</u> CT 3'; reverse primer used in construction of pYT108 and pYT296; XbaI site underlined                                                                               |
| 1358 | 5' GCTAGG <u>TTCGACCTTAAGTACGCACAAGGAGAGTATGC</u> 3'; forward primer used in construction of pYT112 and pYT296; Sall site underlined                                                                              |
| 1366 | 5' GCTAGG <u>TTCGACACCAGAACCACCACCAGAACCACCTTTGTAGAGCT</u><br>CATCCATGCCGTG 3'; reverse primer used in the construction of pYT296; Sall site underlined; 24 nucleotide linker sequence immediately after Sal site |
| 1400 | 5' GCTAGG <u>CATGCTTATCTGTATAAAGTGAAATGTCCAAC</u> 3'; reverse primer used in construction of pSK50, pSK53, pSK54 and pSK60; SphI site underlined                                                                  |
| 1694 | 5' GCTAGT <u>CTAGACCGGATCCAATTACATTTACAGCAG</u> 3'; forward primer used in construction of pSK45 and pSK50; XbaI site underlined                                                                                  |
| 1749 | 5' GCTAGT <u>CTAGACTCGAGGGTCCGGCTGGTCTGT</u> 3'; forward primer used in construction of pYT296; XbaI site underlined                                                                                              |
| 1828 | 5' GCTAGT <u>CTAGA</u> ACAGCTTACGAAGTACCAGGATCTATG 3'; forward primer used in construction of pSK51 and pSK53; XbaI site underlined                                                                               |
| 1829 | 5' GCTAGT <u>CTAGAGCAGGTACAGAAATTAGACCGGCA</u> 3'; forward primer used in construction of pSK52 and pSK54; XbaI site underlined                                                                                   |
| 1843 | 5' GCTAGT <u>CTAGAGTGGTGATTACAATTGATCCAAGC</u> 3'; forward primer used in construction of pSK55; XbaI site underlined                                                                                             |
| 1868 | 5' GCTAGT <u>CTAGAGT</u> CGAAGTGCCATCGATTACAGTA 3'; forward primer used in construction of pSK57; XbaI site underlined                                                                                            |
| 1869 | 5' GCTAGG <u>CATGCAACTGCTTTTTGTGCTATTGCGTT</u> 3'; reverse primer used in construction of pSK69; SphI site underlined                                                                                             |
| 1879 | 5' GCTAGT <u>CTAGAGGTGTTTGGAACGTAATTACAGCT</u> 3'; forward primer used in construction of pSK59 and pSK60; XbaI site underlined                                                                                   |
| 1880 | 5' GCTAGT <u>CTAGACGTTCTGAAATTACGTTACTCCG</u> 3'; forward primer used in construction of pSK61; XbaI site underlined                                                                                              |
| 1881 | 5' GCTAGT <u>CTAGATTCGTAATGATCTGCCAACAGTA</u> 3'; forward primer used in construction of pSK64; XbaI site underlined                                                                                              |
| 1882 | 5' GCTAGG <u>CATGCATAAATGTTTGAATGCCATCTCCT</u> 3'; reverse primer used in construction of pSK64; SphI site underlined                                                                                             |
| 1883 | 5' GCTAGG <u>CATGCTGGCGAGGAATTACCTTCTGGTGA</u> 3'; reverse primer used in construction of pSK68; SphI site underlined                                                                                             |
| 1892 | 5' GCTAGG <u>CATGCAGTCCAAATCAATAAAATGGCTTA</u> 3'; reverse primer used in construction of pSK57 and pSK69; SphI site underlined                                                                                   |
| 2429 | 5' GCTAGT <u>CTAGATTCCCCGGTAGAGATAGTTATGGCTAT</u> 3'; forward primer used in construction of pJJ21; XbaI site underlined                                                                                          |
| 2430 | 5' GCTAGG <u>TTCGACTTACTTGTACAGCTCGTCCATGCCG</u> 3'; reverse primer used in construction of pJJ21; Sall site underlined                                                                                           |

## Supplemental Movie Legends

**Movie S1.** Movement of fluorescently labeled SprB along the cell surface. Cells of *F. johnsoniae* strains were grown in MM medium at 25°C without shaking until late exponential phase. Cells were labeled with fluorescent antibodies as indicated in Materials and Methods, introduced into tunnel slides, and examined at 25°C. Suspended cells were examined to avoid confusion resulting from the gliding movement of cells over surfaces. The two sequences shown correspond to 15 seconds each. Left) Wild-type *F. johnsoniae* UW101 cells with Alexa Fluor-594-labeled anti-SprB antibodies. Right) Cells of CJ2491, expressing full length SprB from the chromosome, with sfGFP inserted after the signal peptide (SP-sfGFP-CTD<sub>SprB(6421AA)</sub>). Cells in the right panel were labeled with anti-GFP followed by goat anti-rabbit IgG conjugated to Alexa-594. Cells in both panels were examined for movement of red fluorescent signals by simultaneous low-light phase contrast and fluorescence microscopy as indicated in Materials and Methods. Cells were also incubated without primary antibody but failed to fluoresce red as shown in Fig. 3, 4 and S5. The 5 sec sequence shown in Fig. 5 of the main text comes from the left panel of this movie.

**Movie S2.** Movement of sfGFP fused to the C-terminal 218 amino acids of SprB along the cell surface. Cells of *F. johnsoniae* strains were labeled with fluorescent antibodies as indicated in Materials and Methods, introduced into tunnel slides, and examined at 25°C. Suspended cells were examined to avoid confusion resulting from the gliding movement of cells over surfaces. The two sequences shown correspond to 15 seconds each. Left) Strain CJ1922 ( $\Delta sprB$ ) expressing SP-sfGFP-CTD<sub>SprB(218AA)</sub> and SprF from pSK55. Right) Strain CJ2839 ( $\Delta sprB gldJ_{548}$ ) expressing SP-sfGFP-CTD<sub>SprB(218AA)</sub> and SprF from pSK55. CJ2839 produces truncated (548 AA) GldJ lacking its C-terminal 13 amino acids, and is nonmotile for this reason but is functional for secretion. The 5 sec sequence shown in Fig. 5 of the main text comes from the left panel of this movie.

**Movie S3.** Lack of movement along the cell surface of sfGFP fused to the C-terminal 228 amino acids of Fjoh\_3952. Cells of *F. johnsoniae* strain CJ1922 ( $\Delta sprB$ ) expressing SP-sfGFP-CTD<sub>Fjoh\_3952(228AA)</sub> and SprF-like protein Fjoh\_3951 from pSK57 were labeled with fluorescent antibodies against sfGFP as indicated in Materials and Methods, introduced into tunnel slides, and examined at 25°C. Suspended cells were examined to avoid confusion resulting from the gliding movement of cells over surfaces. The sequence shown corresponds to 15 seconds.

**Movie S4.** Effect of expression of SP-sfGFP fused to C-terminal regions of SprB on movement of wild type *F. johnsoniae* cells. Movement of cells of wild type strain CJ1827 carrying control vector pCP23 (top left), pSK59, which expresses SP-GFP-CTD<sub>SprB(149AA)</sub> and SprF (top right), pSK55, which expresses SP-sfGFP-CTD<sub>SprB(218AA)</sub> and SprF (bottom left), and pSK61, which expresses SP-sfGFP-CTD<sub>SprB(1182AA)</sub> and SprF (bottom right). Cells in MM were introduced into tunnel slides, incubated for 5 min, and cells on the cover slip were examined using a Photometrics CoolSNAP<sub>cf</sub><sup>2</sup> camera mounted on an Olympus BH-2 phase-contrast microscope with a heated stage at 25°C. Four 60-second sequences (speeded up six-fold, resulting in 10-sec playback) are shown. The sequences in this movie correspond to 60 seconds of the 120 sec depicted in the rainbow traces in Fig. 7 of the main text.



**Movie S5.** Effect of expression of SP-sfGFP fused to C-terminal regions of SprB on movement of *F. johnsoniae*  $\Delta sprB$  mutant cells. Movement of  $\Delta sprB$  mutant cells (strain CJ1922) carrying control vector pCP23 (top left), pSK59, which expresses SP-sfGFP-CTD<sub>SprB(149AA)</sub> and SprF (top right), pSK55, which expresses SP-sfGFP-CTD<sub>SprB(218AA)</sub> and SprF (bottom left), and pSK61, which expresses SP-sfGFP-CTD<sub>SprB(1182AA)</sub> and SprF (bottom right). Cells in MM were introduced into tunnel slides, incubated for 5 min, and cells on the cover slip were examined at 25°C. Four 60-second sequences (speeded up six-fold, resulting in 10-sec playback) are shown. The sequences in this movie correspond to 60 seconds of the 120 sec depicted in the rainbow traces in Fig. 7 of the main text.

## References

1. **Kharade SS, McBride MJ.** 2014. The *Flavobacterium johnsoniae* chitinase ChiA is required for chitin utilization and is secreted by the type IX secretion system. *J. Bacteriol.* **196**:961-970.
2. **Kulkarni SS, Zhu Y, Brendel CJ, McBride MJ.** 2017. Diverse C-terminal sequences involved in *Flavobacterium johnsoniae* protein secretion. *J. Bacteriol.* **199**:e00884-00816.
3. **Kharade SS, McBride MJ.** 2015. *Flavobacterium johnsoniae* PorV is required for secretion of a subset of proteins targeted to the type IX secretion system. *J. Bacteriol.* **197**:147-158.
4. **Shrivastava A, Rhodes RG, Pochiraju S, Nakane D, McBride MJ.** 2012. *Flavobacterium johnsoniae* RemA is a mobile cell-surface lectin involved in gliding. *J. Bacteriol.* **194**:3678-3688.
5. **Lombard V, Golaconda Ramulu H, Drula E, Coutinho PM, Henrissat B.** 2014. The carbohydrate-active enzymes database (CAZy) in 2013. *Nucleic Acids Res* **42**:D490-495.
6. **Nelson SS, Bollampalli S, McBride MJ.** 2008. SprB is a cell surface component of the *Flavobacterium johnsoniae* gliding motility machinery. *J. Bacteriol.* **190**:2851-2857.
7. **Veith PD, Nor Muhammad NA, Dashper SG, Likic VA, Gorasia DG, Chen D, Byrne SJ, Catmull DV, Reynolds EC.** 2013. Protein substrates of a novel secretion system are numerous in the *Bacteroidetes* phylum and have in common a cleavable C-terminal secretion signal, extensive post-translational modification and cell surface attachment. *J. Proteome Res.* **12**:4449-4461.
